# Supplementary material
Source: PubMed Central journal article supplement (PMC3583564)
Supplement: NIHMS405516-supplement-table_1.pdf [file NIHMS405516-supplement-table_1.pdf]

Supplementary Table 1  
Model Convergence Rate

| Sample Size | Distribution | Statistical |         |         |         |         |
|-------------|--------------|-------------|---------|---------|---------|---------|
|             |              | Power       | CPI     | GAPI    | UPI     | LMS     |
| 100         | Normal       | 0           | 98.93%  | 97.80%  | 94.93%  | 99.67%  |
| 100         | Uniform      | 0           | 99.27%  | 98.53%  | 95.13%  | 99.60%  |
| 100         | K1           | 0           | 94.13%  | 90.53%  | 87.80%  | 99.07%  |
| 100         | K2           | 0           | 88.87%  | 83.60%  | 84.73%  | 98.53%  |
| 100         | $\chi^2_1$   | 0           | 88.60%  | 81.67%  | 87.33%  | 99.27%  |
| 200         | Normal       | 0           | 99.87%  | 99.80%  | 99.73%  | 99.87%  |
| 200         | Uniform      | 0           | 100.00% | 99.93%  | 99.40%  | 99.80%  |
| 200         | K1           | 0           | 97.67%  | 97.60%  | 97.73%  | 99.87%  |
| 200         | K2           | 0           | 95.20%  | 93.40%  | 95.80%  | 99.80%  |
| 200         | $\chi^2_1$   | 0           | 96.53%  | 96.87%  | 98.27%  | 99.80%  |
| 500         | Normal       | 0           | 99.93%  | 99.93%  | 99.67%  | 100.00% |
| 500         | Uniform      | 0           | 99.73%  | 99.87%  | 99.80%  | 100.00% |
| 500         | K1           | 0           | 99.67%  | 99.20%  | 99.33%  | 99.47%  |
| 500         | K2           | 0           | 98.53%  | 97.93%  | 99.07%  | 98.53%  |
| 500         | $\chi^2_1$   | 0           | 99.67%  | 98.73%  | 99.87%  | 100.00% |
| 1000        | Normal       | 0           | 99.73%  | 99.80%  | 99.47%  | 100.00% |
| 1000        | Uniform      | 0           | 99.87%  | 99.93%  | 100.00% | 100.00% |
| 1000        | K1           | 0           | 100.00% | 99.20%  | 99.73%  | 98.27%  |
| 1000        | K2           | 0           | 99.67%  | 98.20%  | 99.47%  | 95.73%  |
| 1000        | $\chi^2_1$   | 0           | 99.80%  | 99.07%  | 99.93%  | 100.00% |
| 5000        | Normal       | 0           | 99.87%  | 100.00% | 100.00% | 100.00% |
| 5000        | Uniform      | 0           | 100.00% | 100.00% | 99.87%  | 100.00% |
| 5000        | K1           | 0           | 100.00% | 98.93%  | 99.93%  | 91.07%  |
| 5000        | K2           | 0           | 99.60%  | 97.00%  | 99.33%  | 75.27%  |
| 5000        | $\chi^2_1$   | 0           | 99.87%  | 99.67%  | 99.93%  | 99.93%  |
| 100         | Normal       | 0.7         | 99.00%  | 97.93%  | 93.53%  | 99.87%  |
| 100         | Uniform      | 0.7         | 99.33%  | 97.40%  | 94.93%  | 99.73%  |
| 100         | K1           | 0.7         | 93.13%  | 85.80%  | 86.07%  | 99.00%  |
| 100         | K2           | 0.7         | 86.87%  | 76.47%  | 78.87%  | 98.40%  |
| 100         | $\chi^2_1$   | 0.7         | 92.27%  | 80.47%  | 86.07%  | 99.73%  |
| 200         | Normal       | 0.7         | 99.80%  | 100.00% | 99.73%  | 99.87%  |
| 200         | Uniform      | 0.7         | 99.87%  | 99.87%  | 99.27%  | 99.93%  |
| 200         | K1           | 0.7         | 97.93%  | 95.87%  | 96.07%  | 99.73%  |
| 200         | K2           | 0.7         | 95.20%  | 91.13%  | 93.80%  | 99.27%  |
| 200         | $\chi^2_1$   | 0.7         | 98.13%  | 94.60%  | 98.40%  | 99.87%  |
| 500         | Normal       | 0.7         | 99.87%  | 99.80%  | 99.87%  | 100.00% |
| 500         | Uniform      | 0.7         | 99.73%  | 99.87%  | 99.60%  | 100.00% |
| 500         | K1           | 0.7         | 99.53%  | 97.60%  | 99.13%  | 98.93%  |
| 500         | K2           | 0.7         | 98.40%  | 95.73%  | 98.33%  | 97.33%  |
| 500         | $\chi^2_1$   | 0.7         | 99.87%  | 98.80%  | 99.93%  | 100.00% |
| 1000        | Normal       | 0.7         | 99.87%  | 99.73%  | 99.73%  | 100.00% |
| 1000        | Uniform      | 0.7         | 99.60%  | 99.73%  | 99.60%  | 100.00% |
| 1000        | K1           | 0.7         | 99.73%  | 99.00%  | 99.67%  | 98.13%  |
| 1000        | K2           | 0.7         | 99.33%  | 97.13%  | 99.07%  | 93.53%  |
| 1000        | $\chi^2_1$   | 0.7         | 99.87%  | 99.27%  | 100.00% | 99.87%  |
| 5000        | Normal       | 0.7         | 99.93%  | 99.87%  | 99.93%  | 100.00% |
| 5000        | Uniform      | 0.7         | 99.87%  | 100.00% | 100.00% | 100.00% |
| 5000        | K1           | 0.7         | 99.87%  | 99.13%  | 100.00% | 90.27%  |
| 5000        | K2           | 0.7         | 99.33%  | 97.07%  | 99.53%  | 74.07%  |
| 5000        | $\chi^2_1$   | 0.7         | 99.93%  | 99.53%  | 99.93%  | 100.00% |
| 100         | Normal       | 0.9         | 99.07%  | 96.73%  | 93.00%  | 99.53%  |
| 100         | Uniform      | 0.9         | 99.40%  | 97.40%  | 94.53%  | 99.87%  |
| 100         | K1           | 0.9         | 92.33%  | 82.67%  | 83.60%  | 99.13%  |
| 100         | K2           | 0.9         | 88.67%  | 77.67%  | 78.93%  | 98.33%  |
| 100         | $\chi^2_1$   | 0.9         | 91.60%  | 79.40%  | 85.33%  | 99.00%  |
| 200         | Normal       | 0.9         | 100.00% | 99.80%  | 99.60%  | 100.00% |
| 200         | Uniform      | 0.9         | 99.87%  | 99.80%  | 99.53%  | 99.93%  |
| 200         | K1           | 0.9         | 97.93%  | 95.60%  | 95.67%  | 99.80%  |
| 200         | K2           | 0.9         | 96.20%  | 90.60%  | 92.53%  | 99.33%  |
| 200         | $\chi^2_1$   | 0.9         | 98.67%  | 95.67%  | 98.33%  | 100.00% |
| 500         | Normal       | 0.9         | 99.93%  | 99.93%  | 100.00% | 99.93%  |
| 500         | Uniform      | 0.9         | 99.87%  | 99.93%  | 99.67%  | 99.93%  |
| 500         | K1           | 0.9         | 99.80%  | 97.60%  | 99.00%  | 98.93%  |
| 500         | K2           | 0.9         | 98.93%  | 94.33%  | 97.27%  | 96.20%  |
| 500         | $\chi^2_1$   | 0.9         | 99.93%  | 99.27%  | 100.00% | 100.00% |
| 1000        | Normal       | 0.9         | 99.93%  | 99.80%  | 99.47%  | 100.00% |
| 1000        | Uniform      | 0.9         | 99.87%  | 99.93%  | 99.93%  | 100.00% |
| 1000        | K1           | 0.9         | 99.60%  | 98.67%  | 99.60%  | 98.27%  |
| 1000        | K2           | 0.9         | 99.13%  | 96.00%  | 98.20%  | 93.00%  |
| 1000        | $\chi^2_1$   | 0.9         | 99.93%  | 99.07%  | 99.93%  | 99.53%  |
| 5000        | Normal       | 0.9         | 99.93%  | 99.80%  | 99.80%  | 100.00% |
| 5000        | Uniform      | 0.9         | 99.80%  | 99.80%  | 100.00% | 100.00% |
| 5000        | K1           | 0.9         | 99.87%  | 99.47%  | 99.73%  | 90.47%  |
| 5000        | K2           | 0.9         | 99.53%  | 96.60%  | 99.47%  | 75.40%  |
| 5000        | $\chi^2_1$   | 0.9         | 100.00% | 99.80%  | 100.00% | 99.93%  |

Note. In the power = 0 condition,  $\gamma_3$  was set to 0 to investigate the Type-I error rate.
