# Supplementary material
Source: PubMed Central journal article supplement (PMC3583564)
Supplement: NIHMS405516-supplement-table_2.pdf [file NIHMS405516-supplement-table_2.pdf]

Supplementary Table 2  
Mean Estimate and Relative Bias of the Lower Order Effects

| Sample |              | Statistical |          | CPI           |                | GAPI          |                | UPI           |                | LMS           |                |
|--------|--------------|-------------|----------|---------------|----------------|---------------|----------------|---------------|----------------|---------------|----------------|
| Size   | Distribution | Power       | $\alpha$ | E( $\alpha$ ) | RB( $\alpha$ ) |
| 100    | Normal       | 0.7         | 10       | 9.830         | -0.017 *       | 9.564         | -0.044 *       | 9.662         | -0.034 *       | 9.869         | -0.013 *       |
| 100    | Uniform      | 0.7         | 10       | 10.439        | 0.044 *        | 9.887         | -0.011 *       | 9.914         | -0.009 *       | 10.442        | 0.044 *        |
| 100    | K1           | 0.7         | 10       | 9.406         | -0.059 *       | 9.815         | -0.018 *       | 9.916         | -0.008 *       | 9.663         | -0.034 *       |
| 100    | K2           | 0.7         | 10       | 9.552         | -0.045 *       | 10.080        | 0.008 *        | 10.092        | 0.009 *        | 9.751         | -0.025 *       |
| 100    | $\chi^2_1$   | 0.7         | 10       | 8.882         | -0.112         | 9.977         | -0.002 *       | 10.091        | 0.009 *        | 8.895         | -0.111         |
| 200    | Normal       | 0.7         | 10       | 10.033        | 0.003 *        | 9.926         | -0.007 *       | 9.980         | -0.002 *       | 10.016        | 0.002 *        |
| 200    | Uniform      | 0.7         | 10       | 10.214        | 0.021 *        | 9.917         | -0.008 *       | 9.917         | -0.008 *       | 10.199        | 0.020 *        |
| 200    | K1           | 0.7         | 10       | 9.648         | -0.035 *       | 10.019        | 0.002 *        | 10.059        | 0.006 *        | 9.836         | -0.016 *       |
| 200    | K2           | 0.7         | 10       | 9.525         | -0.048 *       | 10.010        | 0.001 *        | 10.033        | 0.003 *        | 9.755         | -0.024 *       |
| 200    | $\chi^2_1$   | 0.7         | 10       | 8.873         | -0.113         | 9.975         | -0.002 *       | 10.018        | 0.002 *        | 8.842         | -0.116         |
| 500    | Normal       | 0.7         | 10       | 9.950         | -0.005 *       | 9.926         | -0.007 *       | 9.930         | -0.007 *       | 9.945         | -0.005 *       |
| 500    | Uniform      | 0.7         | 10       | 10.149        | 0.015 *        | 10.003        | 0.000 *        | 10.013        | 0.001 *        | 10.131        | 0.013 *        |
| 500    | K1           | 0.7         | 10       | 9.720         | -0.028 *       | 10.056        | 0.006 *        | 10.059        | 0.006 *        | 9.838         | -0.016 *       |
| 500    | K2           | 0.7         | 10       | 9.594         | -0.041 *       | 9.978         | -0.002 *       | 10.000        | 0.000 *        | 9.736         | -0.026 *       |
| 500    | $\chi^2_1$   | 0.7         | 10       | 8.855         | -0.114         | 9.971         | -0.003 *       | 9.977         | -0.002 *       | 8.823         | -0.118         |
| 1000   | Normal       | 0.7         | 10       | 9.991         | -0.001 *       | 9.984         | -0.002 *       | 9.991         | -0.001 *       | 9.986         | -0.001 *       |
| 1000   | Uniform      | 0.7         | 10       | 10.045        | 0.004 *        | 9.958         | -0.004 *       | 9.960         | -0.004 *       | 10.036        | 0.004 *        |
| 1000   | K1           | 0.7         | 10       | 9.723         | -0.028 *       | 9.985         | -0.002 *       | 9.984         | -0.002 *       | 9.815         | -0.019 *       |
| 1000   | K2           | 0.7         | 10       | 9.695         | -0.031 *       | 9.999         | 0.000 *        | 10.007        | 0.001 *        | 9.809         | -0.019 *       |
| 1000   | $\chi^2_1$   | 0.7         | 10       | 8.968         | -0.103         | 9.996         | 0.000 *        | 9.998         | 0.000 *        | 8.923         | -0.108         |
| 5000   | Normal       | 0.7         | 10       | 9.983         | -0.002 *       | 9.982         | -0.002 *       | 9.982         | -0.002 *       | 9.982         | -0.002 *       |
| 5000   | Uniform      | 0.7         | 10       | 10.013        | 0.001 *        | 9.980         | -0.002 *       | 9.980         | -0.002 *       | 10.009        | 0.001 *        |
| 5000   | K1           | 0.7         | 10       | 9.854         | -0.015 *       | 9.991         | -0.001 *       | 9.991         | -0.001 *       | 9.910         | -0.009 *       |
| 5000   | K2           | 0.7         | 10       | 9.865         | -0.014 *       | 10.015        | 0.002 *        | 10.017        | 0.002 *        | 9.914         | -0.009 *       |
| 5000   | $\chi^2_1$   | 0.7         | 10       | 9.104         | -0.090 *       | 9.987         | -0.001 *       | 9.991         | -0.001 *       | 9.034         | -0.097 *       |
| 100    | Normal       | 0.9         | 10       | 10.115        | 0.012 *        | 9.772         | -0.023 *       | 9.923         | -0.008 *       | 10.137        | 0.014 *        |
| 100    | Uniform      | 0.9         | 10       | 10.312        | 0.031 *        | 9.590         | -0.041 *       | 9.681         | -0.032 *       | 10.198        | 0.020 *        |
| 100    | K1           | 0.9         | 10       | 9.599         | -0.040 *       | 10.071        | 0.007 *        | 10.150        | 0.015 *        | 9.858         | -0.014 *       |
| 100    | K2           | 0.9         | 10       | 9.367         | -0.063 *       | 9.980         | -0.002 *       | 10.042        | 0.004 *        | 9.648         | -0.035 *       |
| 100    | $\chi^2_1$   | 0.9         | 10       | 9.009         | -0.099 *       | 10.128        | 0.013 *        | 10.267        | 0.027 *        | 9.013         | -0.099 *       |
| 200    | Normal       | 0.9         | 10       | 9.926         | -0.007 *       | 9.760         | -0.024 *       | 9.799         | -0.020 *       | 9.955         | -0.005 *       |
| 200    | Uniform      | 0.9         | 10       | 10.264        | 0.026 *        | 9.861         | -0.014 *       | 9.855         | -0.015 *       | 10.228        | 0.023 *        |
| 200    | K1           | 0.9         | 10       | 9.381         | -0.062 *       | 9.888         | -0.011 *       | 9.942         | -0.006 *       | 9.623         | -0.038 *       |
| 200    | K2           | 0.9         | 10       | 9.427         | -0.057 *       | 9.993         | -0.001 *       | 10.028        | 0.003 *        | 9.677         | -0.032 *       |
| 200    | $\chi^2_1$   | 0.9         | 10       | 8.835         | -0.116         | 10.104        | 0.010 *        | 10.095        | 0.010 *        | 8.862         | -0.114         |
| 500    | Normal       | 0.9         | 10       | 10.007        | 0.001 *        | 9.973         | -0.003 *       | 9.981         | -0.002 *       | 10.028        | 0.003 *        |
| 500    | Uniform      | 0.9         | 10       | 10.107        | 0.011 *        | 9.947         | -0.005 *       | 9.955         | -0.005 *       | 10.071        | 0.007 *        |
| 500    | K1           | 0.9         | 10       | 9.558         | -0.044 *       | 9.980         | -0.002 *       | 9.999         | 0.000 *        | 9.713         | -0.029 *       |
| 500    | K2           | 0.9         | 10       | 9.529         | -0.047 *       | 10.046        | 0.005 *        | 10.055        | 0.006 *        | 9.745         | -0.025 *       |
| 500    | $\chi^2_1$   | 0.9         | 10       | 8.862         | -0.114         | 10.012        | 0.001 *        | 10.037        | 0.004 *        | 8.830         | -0.117         |
| 1000   | Normal       | 0.9         | 10       | 10.012        | 0.001 *        | 10.001        | 0.000 *        | 10.005        | 0.001 *        | 10.006        | 0.001 *        |
| 1000   | Uniform      | 0.9         | 10       | 10.127        | 0.013 *        | 10.015        | 0.002 *        | 10.019        | 0.002 *        | 10.098        | 0.010 *        |
| 1000   | K1           | 0.9         | 10       | 9.666         | -0.033 *       | 10.013        | 0.001 *        | 10.019        | 0.002 *        | 9.807         | -0.019 *       |
| 1000   | K2           | 0.9         | 10       | 9.608         | -0.039 *       | 10.017        | 0.002 *        | 10.013        | 0.001 *        | 9.765         | -0.023 *       |
| 1000   | $\chi^2_1$   | 0.9         | 10       | 8.914         | -0.109         | 9.996         | 0.000 *        | 9.995         | -0.001 *       | 8.863         | -0.114         |
| 5000   | Normal       | 0.9         | 10       | 9.999         | 0.000 *        | 9.996         | 0.000 *        | 9.997         | 0.000 *        | 9.991         | -0.001 *       |
| 5000   | Uniform      | 0.9         | 10       | 10.026        | 0.003 *        | 9.978         | -0.002 *       | 9.980         | -0.002 *       | 10.015        | 0.002 *        |
| 5000   | K1           | 0.9         | 10       | 9.843         | -0.016 *       | 10.019        | 0.002 *        | 10.020        | 0.002 *        | 9.914         | -0.009 *       |
| 5000   | K2           | 0.9         | 10       | 9.787         | -0.021 *       | 9.992         | -0.001 *       | 9.990         | -0.001 *       | 9.888         | -0.011 *       |
| 5000   | $\chi^2_1$   | 0.9         | 10       | 9.104         | -0.090 *       | 10.023        | 0.002 *        | 10.022        | 0.002 *        | 9.031         | -0.097 *       |

Note . E means the expected value (average) of the effects. RB means relative bias. \* means relative bias  $\leq |10\%|$  criterion met.

Supplementary Table 2 (Continued)

Mean Estimate and Relative Bias of the Lower Order Effects

| Sample Size | Statistical Distribution | Power | $\gamma_1$ | CPI           |                  | GAPI          |                  | UPI           |                  | LMS           |                  |
|-------------|--------------------------|-------|------------|---------------|------------------|---------------|------------------|---------------|------------------|---------------|------------------|
|             |                          |       |            | $E(\gamma_1)$ | RB( $\gamma_1$ ) |
| 100         | Normal                   | 0.7   | 7          | 6.879         | -0.017 *         | 7.068         | 0.010 *          | 7.068         | 0.010 *          | 6.878         | -0.017 *         |
| 100         | Uniform                  | 0.7   | 7          | 7.399         | 0.057 *          | 7.415         | 0.059 *          | 7.360         | 0.051 *          | 7.245         | 0.035 *          |
| 100         | K1                       | 0.7   | 7          | 6.545         | -0.065 *         | 7.474         | 0.068 *          | 7.568         | 0.081 *          | 6.923         | -0.011 *         |
| 100         | K2                       | 0.7   | 7          | 6.442         | -0.080 *         | 7.524         | 0.075 *          | 7.785         | 0.112            | 6.978         | -0.003 *         |
| 100         | $\chi^2_1$               | 0.7   | 7          | 6.896         | -0.015 *         | 7.071         | 0.010 *          | 7.022         | 0.003 *          | 6.415         | -0.084 *         |
| 200         | Normal                   | 0.7   | 7          | 7.106         | 0.015 *          | 7.185         | 0.026 *          | 7.181         | 0.026 *          | 7.128         | 0.018 *          |
| 200         | Uniform                  | 0.7   | 7          | 7.224         | 0.032 *          | 7.171         | 0.024 *          | 7.176         | 0.025 *          | 7.136         | 0.019 *          |
| 200         | K1                       | 0.7   | 7          | 6.538         | -0.066 *         | 7.207         | 0.030 *          | 7.206         | 0.029 *          | 6.921         | -0.011 *         |
| 200         | K2                       | 0.7   | 7          | 6.336         | -0.095 *         | 7.177         | 0.025 *          | 7.155         | 0.022 *          | 6.913         | -0.012 *         |
| 200         | $\chi^2_1$               | 0.7   | 7          | 6.475         | -0.075 *         | 7.268         | 0.038 *          | 7.120         | 0.017 *          | 6.116         | -0.126           |
| 500         | Normal                   | 0.7   | 7          | 7.051         | 0.007 *          | 7.067         | 0.010 *          | 7.078         | 0.011 *          | 7.054         | 0.008 *          |
| 500         | Uniform                  | 0.7   | 7          | 7.099         | 0.014 *          | 7.013         | 0.002 *          | 7.014         | 0.002 *          | 6.993         | -0.001 *         |
| 500         | K1                       | 0.7   | 7          | 6.425         | -0.082 *         | 7.085         | 0.012 *          | 7.044         | 0.006 *          | 6.912         | -0.013 *         |
| 500         | K2                       | 0.7   | 7          | 6.311         | -0.098 *         | 7.183         | 0.026 *          | 7.128         | 0.018 *          | 6.958         | -0.006 *         |
| 500         | $\chi^2_1$               | 0.7   | 7          | 6.167         | -0.119           | 7.211         | 0.030 *          | 7.145         | 0.021 *          | 6.048         | -0.136           |
| 1000        | Normal                   | 0.7   | 7          | 7.013         | 0.002 *          | 7.021         | 0.003 *          | 7.025         | 0.004 *          | 7.016         | 0.002 *          |
| 1000        | Uniform                  | 0.7   | 7          | 7.112         | 0.016 *          | 7.021         | 0.003 *          | 7.022         | 0.003 *          | 7.008         | 0.001 *          |
| 1000        | K1                       | 0.7   | 7          | 6.375         | -0.089 *         | 7.112         | 0.016 *          | 7.076         | 0.011 *          | 6.968         | -0.005 *         |
| 1000        | K2                       | 0.7   | 7          | 6.118         | -0.126           | 7.048         | 0.007 *          | 7.029         | 0.004 *          | 6.877         | -0.018 *         |
| 1000        | $\chi^2_1$               | 0.7   | 7          | 5.906         | -0.156           | 7.001         | 0.000 *          | 7.004         | 0.001 *          | 5.931         | -0.153           |
| 5000        | Normal                   | 0.7   | 7          | 6.990         | -0.001 *         | 6.993         | -0.001 *         | 6.993         | -0.001 *         | 6.993         | -0.001 *         |
| 5000        | Uniform                  | 0.7   | 7          | 7.107         | 0.015 *          | 7.006         | 0.001 *          | 7.008         | 0.001 *          | 7.007         | 0.001 *          |
| 5000        | K1                       | 0.7   | 7          | 6.220         | -0.111           | 7.043         | 0.006 *          | 7.025         | 0.004 *          | 6.981         | -0.003 *         |
| 5000        | K2                       | 0.7   | 7          | 5.900         | -0.157           | 7.024         | 0.003 *          | 7.014         | 0.002 *          | 6.957         | -0.006 *         |
| 5000        | $\chi^2_1$               | 0.7   | 7          | 5.718         | -0.183           | 6.986         | -0.002 *         | 6.976         | -0.003 *         | 5.868         | -0.162           |
| 100         | Normal                   | 0.9   | 7          | 7.309         | 0.044 *          | 7.661         | 0.094 *          | 7.633         | 0.090 *          | 7.221         | 0.032 *          |
| 100         | Uniform                  | 0.9   | 7          | 7.410         | 0.059 *          | 7.471         | 0.067 *          | 7.455         | 0.065 *          | 7.294         | 0.042 *          |
| 100         | K1                       | 0.9   | 7          | 6.526         | -0.068 *         | 7.169         | 0.024 *          | 7.477         | 0.068 *          | 6.968         | -0.005 *         |
| 100         | K2                       | 0.9   | 7          | 6.548         | -0.065 *         | 7.528         | 0.075 *          | 7.589         | 0.084 *          | 6.986         | -0.002 *         |
| 100         | $\chi^2_1$               | 0.9   | 7          | 7.363         | 0.052 *          | 7.710         | 0.101            | 7.754         | 0.108            | 6.843         | -0.022 *         |
| 200         | Normal                   | 0.9   | 7          | 7.156         | 0.022 *          | 7.236         | 0.034 *          | 7.240         | 0.034 *          | 7.134         | 0.019 *          |
| 200         | Uniform                  | 0.9   | 7          | 7.263         | 0.038 *          | 7.200         | 0.029 *          | 7.176         | 0.025 *          | 7.177         | 0.025 *          |
| 200         | K1                       | 0.9   | 7          | 6.518         | -0.069 *         | 7.193         | 0.028 *          | 7.236         | 0.034 *          | 6.951         | -0.007 *         |
| 200         | K2                       | 0.9   | 7          | 6.386         | -0.088 *         | 7.227         | 0.032 *          | 7.177         | 0.025 *          | 6.983         | -0.002 *         |
| 200         | $\chi^2_1$               | 0.9   | 7          | 6.489         | -0.073 *         | 7.047         | 0.007 *          | 6.916         | -0.012 *         | 5.961         | -0.148           |
| 500         | Normal                   | 0.9   | 7          | 7.149         | 0.021 *          | 7.153         | 0.022 *          | 7.152         | 0.022 *          | 7.131         | 0.019 *          |
| 500         | Uniform                  | 0.9   | 7          | 7.051         | 0.007 *          | 6.980         | -0.003 *         | 6.982         | -0.003 *         | 6.959         | -0.006 *         |
| 500         | K1                       | 0.9   | 7          | 6.389         | -0.087 *         | 7.039         | 0.006 *          | 7.035         | 0.005 *          | 6.903         | -0.014 *         |
| 500         | K2                       | 0.9   | 7          | 6.258         | -0.106           | 7.138         | 0.020 *          | 7.111         | 0.016 *          | 6.938         | -0.009 *         |
| 500         | $\chi^2_1$               | 0.9   | 7          | 6.194         | -0.115           | 7.050         | 0.007 *          | 7.027         | 0.004 *          | 5.996         | -0.143           |
| 1000        | Normal                   | 0.9   | 7          | 7.012         | 0.002 *          | 7.018         | 0.003 *          | 7.027         | 0.004 *          | 7.017         | 0.002 *          |
| 1000        | Uniform                  | 0.9   | 7          | 7.101         | 0.014 *          | 7.007         | 0.001 *          | 7.008         | 0.001 *          | 7.004         | 0.001 *          |
| 1000        | K1                       | 0.9   | 7          | 6.310         | -0.099 *         | 7.025         | 0.004 *          | 7.015         | 0.002 *          | 6.916         | -0.012 *         |
| 1000        | K2                       | 0.9   | 7          | 6.117         | -0.126           | 7.040         | 0.006 *          | 7.018         | 0.003 *          | 6.857         | -0.020 *         |
| 1000        | $\chi^2_1$               | 0.9   | 7          | 6.022         | -0.140           | 7.092         | 0.013 *          | 7.057         | 0.008 *          | 5.962         | -0.148           |
| 5000        | Normal                   | 0.9   | 7          | 7.023         | 0.003 *          | 7.026         | 0.004 *          | 7.025         | 0.004 *          | 7.022         | 0.003 *          |
| 5000        | Uniform                  | 0.9   | 7          | 7.086         | 0.012 *          | 6.986         | -0.002 *         | 6.986         | -0.002 *         | 6.985         | -0.002 *         |
| 5000        | K1                       | 0.9   | 7          | 6.220         | -0.111           | 7.006         | 0.001 *          | 6.994         | -0.001 *         | 6.952         | -0.007 *         |
| 5000        | K2                       | 0.9   | 7          | 5.929         | -0.153           | 7.005         | 0.001 *          | 6.996         | -0.001 *         | 6.962         | -0.005 *         |
| 5000        | $\chi^2_1$               | 0.9   | 7          | 5.766         | -0.176           | 7.013         | 0.002 *          | 7.005         | 0.001 *          | 5.894         | -0.158           |

Note . E means the expected value (average) of the effects. RB means relative bias. \* means relative bias  $\leq |10\%|$  criterion met.

Supplementary Table 2 (Continued)

Mean Estimate and Relative Bias of the Lower Order Effects

| Sample | Statistical |              | $\gamma_2$ | CPI   |               | GAPI             |               | UPI              |               | LMS              |               |
|--------|-------------|--------------|------------|-------|---------------|------------------|---------------|------------------|---------------|------------------|---------------|
|        | Size        | Distribution |            | Power | $E(\gamma_2)$ | RB( $\gamma_2$ ) | $E(\gamma_2)$ | RB( $\gamma_2$ ) | $E(\gamma_2)$ | RB( $\gamma_2$ ) | $E(\gamma_2)$ |
| 100    | Normal      | 0.7          | 7          | 7.289 | 0.041 *       | 7.419            | 0.060 *       | 7.576            | 0.082 *       | 7.318            | 0.045 *       |
| 100    | Uniform     | 0.7          | 7          | 7.467 | 0.067 *       | 7.535            | 0.076 *       | 7.589            | 0.084 *       | 7.412            | 0.059 *       |
| 100    | K1          | 0.7          | 7          | 6.637 | -0.052 *      | 7.217            | 0.031 *       | 7.264            | 0.038 *       | 6.919            | -0.012 *      |
| 100    | K2          | 0.7          | 7          | 6.407 | -0.085 *      | 7.302            | 0.043 *       | 7.065            | 0.009 *       | 6.826            | -0.025 *      |
| 100    | $\chi^2_1$  | 0.7          | 7          | 7.141 | 0.020 *       | 7.455            | 0.065 *       | 7.652            | 0.093 *       | 6.630            | -0.053 *      |
| 200    | Normal      | 0.7          | 7          | 7.163 | 0.023 *       | 7.210            | 0.030 *       | 7.226            | 0.032 *       | 7.143            | 0.020 *       |
| 200    | Uniform     | 0.7          | 7          | 7.338 | 0.048 *       | 7.318            | 0.045 *       | 7.316            | 0.045 *       | 7.239            | 0.034 *       |
| 200    | K1          | 0.7          | 7          | 6.526 | -0.068 *      | 7.198            | 0.028 *       | 7.161            | 0.023 *       | 7.003            | 0.000 *       |
| 200    | K2          | 0.7          | 7          | 6.248 | -0.107 *      | 7.191            | 0.027 *       | 7.175            | 0.025 *       | 6.829            | -0.024 *      |
| 200    | $\chi^2_1$  | 0.7          | 7          | 6.596 | -0.058 *      | 7.328            | 0.047 *       | 7.269            | 0.038 *       | 6.233            | -0.110        |
| 500    | Normal      | 0.7          | 7          | 7.047 | 0.007 *       | 7.059            | 0.008 *       | 7.066            | 0.009 *       | 7.046            | 0.007 *       |
| 500    | Uniform     | 0.7          | 7          | 7.157 | 0.022 *       | 7.080            | 0.011 *       | 7.084            | 0.012 *       | 7.050            | 0.007 *       |
| 500    | K1          | 0.7          | 7          | 6.479 | -0.074 *      | 7.200            | 0.029 *       | 7.128            | 0.018 *       | 7.016            | 0.002 *       |
| 500    | K2          | 0.7          | 7          | 6.178 | -0.117 *      | 7.089            | 0.013 *       | 7.042            | 0.006 *       | 6.869            | -0.019 *      |
| 500    | $\chi^2_1$  | 0.7          | 7          | 6.078 | -0.132 *      | 7.098            | 0.014 *       | 7.041            | 0.006 *       | 5.947            | -0.150        |
| 1000   | Normal      | 0.7          | 7          | 7.045 | 0.006 *       | 7.058            | 0.008 *       | 7.056            | 0.008 *       | 7.034            | 0.005 *       |
| 1000   | Uniform     | 0.7          | 7          | 7.154 | 0.022 *       | 7.060            | 0.009 *       | 7.057            | 0.008 *       | 7.055            | 0.008 *       |
| 1000   | K1          | 0.7          | 7          | 6.363 | -0.091 *      | 7.066            | 0.009 *       | 7.038            | 0.005 *       | 6.961            | -0.006 *      |
| 1000   | K2          | 0.7          | 7          | 6.104 | -0.128 *      | 7.057            | 0.008 *       | 7.020            | 0.003 *       | 6.930            | -0.010 *      |
| 1000   | $\chi^2_1$  | 0.7          | 7          | 5.863 | -0.162 *      | 6.976            | -0.003 *      | 6.960            | -0.006 *      | 5.875            | -0.161        |
| 5000   | Normal      | 0.7          | 7          | 7.020 | 0.003 *       | 7.023            | 0.003 *       | 7.025            | 0.004 *       | 7.023            | 0.003 *       |
| 5000   | Uniform     | 0.7          | 7          | 7.092 | 0.013 *       | 6.990            | -0.001 *      | 6.992            | -0.001 *      | 6.992            | -0.001 *      |
| 5000   | K1          | 0.7          | 7          | 6.176 | -0.118 *      | 6.987            | -0.002 *      | 6.972            | -0.004 *      | 6.917            | -0.012 *      |
| 5000   | K2          | 0.7          | 7          | 5.892 | -0.158 *      | 7.007            | 0.001 *       | 6.992            | -0.001 *      | 6.933            | -0.010 *      |
| 5000   | $\chi^2_1$  | 0.7          | 7          | 5.732 | -0.181 *      | 7.003            | 0.000 *       | 6.991            | -0.001 *      | 5.887            | -0.159        |
| 100    | Normal      | 0.9          | 7          | 7.221 | 0.032 *       | 7.295            | 0.042 *       | 7.344            | 0.049 *       | 7.213            | 0.030 *       |
| 100    | Uniform     | 0.9          | 7          | 7.257 | 0.037 *       | 7.277            | 0.040 *       | 7.290            | 0.041 *       | 7.177            | 0.025 *       |
| 100    | K1          | 0.9          | 7          | 6.686 | -0.045 *      | 7.465            | 0.066 *       | 7.388            | 0.055 *       | 6.972            | -0.004 *      |
| 100    | K2          | 0.9          | 7          | 6.303 | -0.100 *      | 7.212            | 0.030 *       | 7.189            | 0.027 *       | 6.864            | -0.019 *      |
| 100    | $\chi^2_1$  | 0.9          | 7          | 6.987 | -0.002 *      | 7.159            | 0.023 *       | 7.409            | 0.058 *       | 6.458            | -0.077 *      |
| 200    | Normal      | 0.9          | 7          | 6.971 | -0.004 *      | 7.020            | 0.003 *       | 7.017            | 0.002 *       | 6.968            | -0.005 *      |
| 200    | Uniform     | 0.9          | 7          | 7.235 | 0.034 *       | 7.213            | 0.030 *       | 7.239            | 0.034 *       | 7.147            | 0.021 *       |
| 200    | K1          | 0.9          | 7          | 6.562 | -0.063 *      | 7.223            | 0.032 *       | 7.189            | 0.027 *       | 7.013            | 0.002 *       |
| 200    | K2          | 0.9          | 7          | 6.254 | -0.107 *      | 7.199            | 0.028 *       | 7.126            | 0.018 *       | 6.727            | -0.039 *      |
| 200    | $\chi^2_1$  | 0.9          | 7          | 6.628 | -0.053 *      | 7.226            | 0.032 *       | 7.187            | 0.027 *       | 6.218            | -0.112        |
| 500    | Normal      | 0.9          | 7          | 6.939 | -0.009 *      | 6.961            | -0.006 *      | 6.964            | -0.005 *      | 6.927            | -0.010 *      |
| 500    | Uniform     | 0.9          | 7          | 7.198 | 0.028 *       | 7.108            | 0.015 *       | 7.116            | 0.017 *       | 7.107            | 0.015 *       |
| 500    | K1          | 0.9          | 7          | 6.436 | -0.081 *      | 7.112            | 0.016 *       | 7.080            | 0.011 *       | 6.974            | -0.004 *      |
| 500    | K2          | 0.9          | 7          | 6.229 | -0.110 *      | 7.090            | 0.013 *       | 7.047            | 0.007 *       | 6.847            | -0.022 *      |
| 500    | $\chi^2_1$  | 0.9          | 7          | 6.142 | -0.123 *      | 6.971            | -0.004 *      | 6.957            | -0.006 *      | 5.940            | -0.151        |
| 1000   | Normal      | 0.9          | 7          | 7.087 | 0.012 *       | 7.104            | 0.015 *       | 7.108            | 0.015 *       | 7.085            | 0.012 *       |
| 1000   | Uniform     | 0.9          | 7          | 7.123 | 0.018 *       | 7.027            | 0.004 *       | 7.026            | 0.004 *       | 7.019            | 0.003 *       |
| 1000   | K1          | 0.9          | 7          | 6.330 | -0.096 *      | 7.062            | 0.009 *       | 7.038            | 0.005 *       | 6.949            | -0.007 *      |
| 1000   | K2          | 0.9          | 7          | 6.129 | -0.124 *      | 7.042            | 0.006 *       | 7.012            | 0.002 *       | 6.924            | -0.011 *      |
| 1000   | $\chi^2_1$  | 0.9          | 7          | 5.959 | -0.149 *      | 7.003            | 0.000 *       | 6.994            | -0.001 *      | 5.906            | -0.156        |
| 5000   | Normal      | 0.9          | 7          | 7.007 | 0.001 *       | 7.010            | 0.001 *       | 7.010            | 0.001 *       | 7.006            | 0.001 *       |
| 5000   | Uniform     | 0.9          | 7          | 7.114 | 0.016 *       | 7.012            | 0.002 *       | 7.013            | 0.002 *       | 7.012            | 0.002 *       |
| 5000   | K1          | 0.9          | 7          | 6.233 | -0.110 *      | 7.025            | 0.004 *       | 7.009            | 0.001 *       | 6.956            | -0.006 *      |
| 5000   | K2          | 0.9          | 7          | 5.945 | -0.151 *      | 7.017            | 0.002 *       | 7.009            | 0.001 *       | 6.926            | -0.011 *      |
| 5000   | $\chi^2_1$  | 0.9          | 7          | 5.749 | -0.179 *      | 6.993            | -0.001 *      | 6.986            | -0.002 *      | 5.873            | -0.161        |

Note . E means the expected value (average) of the effects. RB means relative bias. \* means relative bias  $\leq |10\%|$  criterion met.
