# Supplementary material
Source: PubMed Central journal article supplement (PMC3583564)
Supplement: NIHMS405516-supplement-table_3.pdf [file NIHMS405516-supplement-table_3.pdf]

Supplementary Table 3  
 Mean Squared Error and Standard Error Ratio of Lower Order Effect Estimates

| Sample Size | Distribution | Statistical Power | $\alpha$ |        |        |        |          |          |           |           |          |          |         |
|-------------|--------------|-------------------|----------|--------|--------|--------|----------|----------|-----------|-----------|----------|----------|---------|
|             |              |                   | MSE      |        |        |        | SE Ratio |          |           |           |          |          |         |
|             |              |                   | CPI      | GAPI   | UPI    | LMS    | CPI (ML) | CPI (SB) | GAPI (ML) | GAPI (SB) | UPI (ML) | UPI (SB) | LMS     |
| 100         | Normal       | 0.7               | 10.776   | 13.222 | 13.108 | 10.294 | 0.909 *  | 0.862    | 0.971 *   | 0.919 *   | 0.981 *  | 0.924 *  | 0.902 * |
| 100         | Uniform      | 0.7               | 11.100   | 15.663 | 15.027 | 10.975 | 0.919 *  | 0.855    | 1.089 *   | 1.013 *   | 1.035 *  | 0.972 *  | 0.903 * |
| 100         | K1           | 0.7               | 10.085   | 11.000 | 12.931 | 9.586  | 0.918 *  | 0.910 *  | 0.936 *   | 0.902 *   | 1.321    | 1.171    | 0.906 * |
| 100         | K2           | 0.7               | 9.108    | 10.296 | 9.977  | 8.400  | 0.946 *  | 0.944 *  | 1.113     | 1.146     | 1.070 *  | 1.047 *  | 0.958 * |
| 100         | $\chi^2_1$   | 0.7               | 10.511   | 12.927 | 14.848 | 10.310 | 0.949 *  | 0.943 *  | 1.083 *   | 1.025 *   | 1.357    | 1.430    | 0.949 * |
| 200         | Normal       | 0.7               | 5.309    | 5.961  | 5.862  | 5.038  | 0.918 *  | 0.891    | 0.924 *   | 0.902 *   | 0.918 *  | 0.897    | 0.916 * |
| 200         | Uniform      | 0.7               | 5.320    | 6.548  | 6.649  | 5.103  | 0.937 *  | 0.893    | 0.954 *   | 0.931 *   | 0.950 *  | 0.926 *  | 0.937 * |
| 200         | K1           | 0.7               | 4.490    | 4.470  | 4.389  | 4.143  | 0.960 *  | 0.988 *  | 0.944 *   | 0.929 *   | 0.944 *  | 0.929 *  | 0.968 * |
| 200         | K2           | 0.7               | 4.234    | 4.177  | 4.153  | 4.005  | 0.993 *  | 1.030 *  | 0.984 *   | 0.971 *   | 0.984 *  | 0.977 *  | 0.983 * |
| 200         | $\chi^2_1$   | 0.7               | 6.393    | 5.441  | 5.519  | 6.265  | 0.897    | 0.928 *  | 0.908 *   | 0.893     | 0.933 *  | 0.940 *  | 0.912 * |
| 500         | Normal       | 0.7               | 1.939    | 2.011  | 2.014  | 1.847  | 0.961 *  | 0.951 *  | 0.961 *   | 0.957 *   | 0.959 *  | 0.955 *  | 0.960 * |
| 500         | Uniform      | 0.7               | 2.044    | 2.286  | 2.305  | 1.966  | 0.957 *  | 0.929 *  | 0.960 *   | 0.957 *   | 0.956 *  | 0.952 *  | 0.958 * |
| 500         | K1           | 0.7               | 1.817    | 1.749  | 1.749  | 1.711  | 0.955 *  | 1.024 *  | 0.932 *   | 0.927 *   | 0.932 *  | 0.928 *  | 0.956 * |
| 500         | K2           | 0.7               | 1.920    | 1.742  | 1.770  | 1.751  | 0.939 *  | 1.025 *  | 0.924 *   | 0.919 *   | 0.917 *  | 0.912 *  | 0.948 * |
| 500         | $\chi^2_1$   | 0.7               | 3.209    | 1.851  | 1.848  | 3.245  | 0.924 *  | 0.990 *  | 0.932 *   | 0.928 *   | 0.933 *  | 0.929 *  | 0.935 * |
| 1000        | Normal       | 0.7               | 1.040    | 1.068  | 1.070  | 1.001  | 0.931 *  | 0.926 *  | 0.926 *   | 0.927 *   | 0.924 *  | 0.926 *  | 0.925 * |
| 1000        | Uniform      | 0.7               | 1.131    | 1.223  | 1.219  | 1.095  | 0.907 *  | 0.885    | 0.918 *   | 0.920 *   | 0.919 *  | 0.921 *  | 0.906 * |
| 1000        | K1           | 0.7               | 0.916    | 0.855  | 0.861  | 0.872  | 0.969 *  | 1.067 *  | 0.939 *   | 0.937 *   | 0.936 *  | 0.934 *  | 0.957 * |
| 1000        | K2           | 0.7               | 0.953    | 0.870  | 0.878  | 0.867  | 0.945 *  | 1.062 *  | 0.923 *   | 0.920 *   | 0.918 *  | 0.916 *  | 0.956 * |
| 1000        | $\chi^2_1$   | 0.7               | 2.037    | 0.954  | 0.946  | 2.123  | 0.910 *  | 0.995 *  | 0.909 *   | 0.912 *   | 0.912 *  | 0.913 *  | 0.915 * |
| 5000        | Normal       | 0.7               | 0.212    | 0.216  | 0.216  | 0.202  | 0.922 *  | 0.921 *  | 0.916 *   | 0.920 *   | 0.916 *  | 0.920 *  | 0.922 * |
| 5000        | Uniform      | 0.7               | 0.205    | 0.220  | 0.220  | 0.204  | 0.951 *  | 0.932 *  | 0.960 *   | 0.966 *   | 0.960 *  | 0.966 *  | 0.938 * |
| 5000        | K1           | 0.7               | 0.199    | 0.173  | 0.174  | 0.182  | 0.933 *  | 1.090 *  | 0.927 *   | 0.927 *   | 0.926 *  | 0.927 *  | 0.937 * |
| 5000        | K2           | 0.7               | 0.189    | 0.164  | 0.166  | 0.172  | 0.943 *  | 1.165    | 0.948 *   | 0.948 *   | 0.942 *  | 0.942 *  | 0.961 * |
| 5000        | $\chi^2_1$   | 0.7               | 0.991    | 0.178  | 0.176  | 1.121  | 0.920 *  | 1.041 *  | 0.935 *   | 0.943 *   | 0.939 *  | 0.943 *  | 0.922 * |
| 100         | Normal       | 0.9               | 10.062   | 13.632 | 12.467 | 9.541  | 0.932 *  | 0.884    | 1.153     | 1.106     | 1.060 *  | 1.003 *  | 0.928 * |
| 100         | Uniform      | 0.9               | 11.453   | 17.606 | 18.134 | 11.235 | 0.899    | 0.833    | 1.024 *   | 0.955 *   | 1.117    | 1.023 *  | 0.883   |
| 100         | K1           | 0.9               | 9.739    | 10.016 | 10.990 | 8.771  | 0.920 *  | 0.911 *  | 0.986 *   | 0.946 *   | 1.017 *  | 0.869    | 0.936 * |
| 100         | K2           | 0.9               | 9.981    | 10.260 | 10.413 | 9.533  | 0.909 *  | 0.909 *  | 0.965 *   | 0.914 *   | 0.956 *  | 0.937 *  | 0.896   |
| 100         | $\chi^2_1$   | 0.9               | 11.659   | 12.923 | 12.093 | 11.340 | 0.882    | 0.882    | 1.132     | 1.096 *   | 1.047 *  | 1.001 *  | 0.889   |
| 200         | Normal       | 0.9               | 5.055    | 5.818  | 5.888  | 4.738  | 0.940 *  | 0.913 *  | 0.937 *   | 0.914 *   | 0.934 *  | 0.912 *  | 0.942 * |
| 200         | Uniform      | 0.9               | 5.243    | 6.444  | 6.637  | 4.992  | 0.943 *  | 0.903 *  | 0.958 *   | 0.938 *   | 0.954 *  | 0.932 *  | 0.945 * |
| 200         | K1           | 0.9               | 5.035    | 4.614  | 4.633  | 4.568  | 0.933 *  | 0.968 *  | 0.924 *   | 0.907 *   | 0.923 *  | 0.908 *  | 0.936 * |
| 200         | K2           | 0.9               | 4.772    | 4.534  | 4.561  | 4.329  | 0.942 *  | 0.981 *  | 0.936 *   | 0.916 *   | 0.928 *  | 0.912 *  | 0.947 * |
| 200         | $\chi^2_1$   | 0.9               | 6.022    | 5.129  | 4.982  | 5.676  | 0.942 *  | 0.984 *  | 0.963 *   | 0.953 *   | 0.953 *  | 0.942 *  | 0.969 * |
| 500         | Normal       | 0.9               | 1.942    | 2.059  | 2.072  | 1.879  | 0.961 *  | 0.949 *  | 0.952 *   | 0.947 *   | 0.948 *  | 0.943 *  | 0.952 * |
| 500         | Uniform      | 0.9               | 2.191    | 2.419  | 2.425  | 2.151  | 0.921 *  | 0.896    | 0.932 *   | 0.930 *   | 0.931 *  | 0.927 *  | 0.912 * |
| 500         | K1           | 0.9               | 2.186    | 1.946  | 1.937  | 1.987  | 0.896    | 0.959 *  | 0.886     | 0.880     | 0.887    | 0.882    | 0.902 * |
| 500         | K2           | 0.9               | 1.995    | 1.783  | 1.797  | 1.748  | 0.938 *  | 1.022 *  | 0.917 *   | 0.911 *   | 0.913 *  | 0.908 *  | 0.950 * |
| 500         | $\chi^2_1$   | 0.9               | 3.299    | 1.895  | 1.905  | 3.331  | 0.901 *  | 0.971 *  | 0.922 *   | 0.919 *   | 0.919 *  | 0.915 *  | 0.912 * |
| 1000        | Normal       | 0.9               | 1.087    | 1.117  | 1.115  | 1.035  | 0.909 *  | 0.904 *  | 0.905 *   | 0.906 *   | 0.905 *  | 0.906 *  | 0.909 * |
| 1000        | Uniform      | 0.9               | 1.050    | 1.112  | 1.116  | 1.015  | 0.948 *  | 0.925 *  | 0.964 *   | 0.967 *   | 0.963 *  | 0.965 *  | 0.945 * |
| 1000        | K1           | 0.9               | 0.948    | 0.823  | 0.825  | 0.849  | 0.971 *  | 1.070 *  | 0.958 *   | 0.955 *   | 0.956 *  | 0.954 *  | 0.976 * |
| 1000        | K2           | 0.9               | 0.972    | 0.803  | 0.807  | 0.848  | 0.969 *  | 1.095 *  | 0.962 *   | 0.959 *   | 0.959 *  | 0.957 *  | 0.989 * |
| 1000        | $\chi^2_1$   | 0.9               | 2.167    | 0.953  | 0.951  | 2.267  | 0.903 *  | 0.988 *  | 0.909 *   | 0.910 *   | 0.909 *  | 0.908 *  | 0.912 * |
| 5000        | Normal       | 0.9               | 0.218    | 0.221  | 0.221  | 0.215  | 0.909 *  | 0.908 *  | 0.906 *   | 0.910 *   | 0.905 *  | 0.910 *  | 0.893   |
| 5000        | Uniform      | 0.9               | 0.219    | 0.236  | 0.236  | 0.216  | 0.923 *  | 0.905 *  | 0.930 *   | 0.936 *   | 0.929 *  | 0.935 *  | 0.912 * |
| 5000        | K1           | 0.9               | 0.203    | 0.173  | 0.173  | 0.183  | 0.932 *  | 1.088 *  | 0.929 *   | 0.929 *   | 0.930 *  | 0.931 *  | 0.932 * |
| 5000        | K2           | 0.9               | 0.221    | 0.173  | 0.175  | 0.182  | 0.929 *  | 1.153    | 0.923 *   | 0.923 *   | 0.917 *  | 0.917 *  | 0.947 * |
| 5000        | $\chi^2_1$   | 0.9               | 0.996    | 0.183  | 0.183  | 1.129  | 0.909 *  | 1.028 *  | 0.922 *   | 0.929 *   | 0.923 *  | 0.927 *  | 0.918 * |

Note . ML means maximum likelihood, SB means Satorra-Bentler correction.\* means  $(0.9 \leq \text{Standard Error Ratio} \leq 1.1)$  criterion met.

Supplementary Table 3 (Continued)  
 Mean Squared Error and Standard Error Ratio of Lower Order Effect Estimates

| Sample Size | Distribution | Statistical Power | $\gamma_1$ |        |        |        |          |          |           |           |          |          |         |
|-------------|--------------|-------------------|------------|--------|--------|--------|----------|----------|-----------|-----------|----------|----------|---------|
|             |              |                   | MSE        |        |        |        | SE Ratio |          |           |           |          |          |         |
|             |              |                   | CPI        | GAPI   | UPI    | LMS    | CPI (ML) | CPI (SB) | GAPI (ML) | GAPI (SB) | UPI (ML) | UPI (SB) | LMS     |
| 100         | Normal       | 0.7               | 14.759     | 20.361 | 18.719 | 13.976 | 0.955 *  | 0.877    | 0.972 *   | 0.917 *   | 1.005 *  | 0.922 *  | 0.974 * |
| 100         | Uniform      | 0.7               | 18.637     | 21.914 | 20.760 | 16.038 | 0.901 *  | 0.852    | 1.040 *   | 0.976 *   | 1.010 *  | 0.939 *  | 0.926 * |
| 100         | K1           | 0.7               | 15.575     | 27.649 | 31.835 | 18.934 | 0.906 *  | 0.769    | 0.941 *   | 0.909 *   | 1.397    | 1.156    | 0.930 * |
| 100         | K2           | 0.7               | 19.394     | 32.625 | 46.139 | 26.529 | 0.844    | 0.692    | 0.953 *   | 0.912 *   | 1.085 *  | 1.020 *  | 0.870   |
| 100         | $\chi^2_1$   | 0.7               | 22.342     | 43.486 | 55.401 | 25.328 | 0.810    | 0.666    | 1.043 *   | 1.048 *   | 1.398    | 1.496    | 0.893   |
| 200         | Normal       | 0.7               | 6.500      | 7.277  | 7.189  | 6.445  | 0.964 *  | 0.934 *  | 0.966 *   | 0.946 *   | 0.971 *  | 0.936 *  | 0.973 * |
| 200         | Uniform      | 0.7               | 6.951      | 7.133  | 7.044  | 6.417  | 0.971 *  | 0.961 *  | 0.988 *   | 0.967 *   | 0.994 *  | 0.964 *  | 0.984 * |
| 200         | K1           | 0.7               | 6.710      | 9.175  | 9.037  | 7.830  | 0.904 *  | 0.792    | 0.912 *   | 0.907 *   | 0.922 *  | 0.878    | 0.939 * |
| 200         | K2           | 0.7               | 6.493      | 10.239 | 11.265 | 8.226  | 0.922 *  | 0.778    | 0.923 *   | 0.931 *   | 0.898    | 0.876    | 0.932 * |
| 200         | $\chi^2_1$   | 0.7               | 7.232      | 12.500 | 12.127 | 8.936  | 0.866    | 0.742    | 0.879     | 0.888     | 0.960 *  | 0.969 *  | 0.939 * |
| 500         | Normal       | 0.7               | 2.294      | 2.347  | 2.329  | 2.282  | 1.008 *  | 1.005 *  | 1.011 *   | 1.010 *   | 1.018 *  | 1.007 *  | 1.019 * |
| 500         | Uniform      | 0.7               | 2.369      | 2.302  | 2.275  | 2.211  | 1.015 *  | 1.032 *  | 1.018 *   | 1.015 *   | 1.025 *  | 1.015 *  | 1.028 * |
| 500         | K1           | 0.7               | 2.273      | 2.604  | 2.422  | 2.345  | 0.988 *  | 0.876    | 0.992 *   | 1.008 *   | 1.026 *  | 1.006 *  | 1.026 * |
| 500         | K2           | 0.7               | 4.114      | 3.249  | 2.998  | 2.878  | 0.724    | 0.615    | 0.905 *   | 0.919 *   | 0.942 *  | 0.914 *  | 0.941 * |
| 500         | $\chi^2_1$   | 0.7               | 2.919      | 3.768  | 3.336  | 3.580  | 0.923 *  | 0.797    | 0.917 *   | 0.941 *   | 0.967 *  | 0.958 *  | 1.004 * |
| 1000        | Normal       | 0.7               | 1.289      | 1.299  | 1.277  | 1.262  | 0.939 *  | 0.946 *  | 0.943 *   | 0.950 *   | 0.954 *  | 0.952 *  | 0.958 * |
| 1000        | Uniform      | 0.7               | 1.284      | 1.227  | 1.219  | 1.196  | 0.971 *  | 0.996 *  | 0.972 *   | 0.978 *   | 0.977 *  | 0.977 *  | 0.984 * |
| 1000        | K1           | 0.7               | 1.738      | 1.289  | 1.201  | 1.214  | 0.813    | 0.722    | 0.970 *   | 0.994 *   | 1.006 *  | 1.000 *  | 0.988 * |
| 1000        | K2           | 0.7               | 2.149      | 1.339  | 1.290  | 1.435  | 0.789    | 0.678    | 0.955 *   | 0.980 *   | 0.983 *  | 0.966 *  | 0.943 * |
| 1000        | $\chi^2_1$   | 0.7               | 2.211      | 1.580  | 1.508  | 2.460  | 0.932 *  | 0.801    | 0.945 *   | 0.982 *   | 0.971 *  | 0.973 *  | 0.982 * |
| 5000        | Normal       | 0.7               | 0.231      | 0.231  | 0.228  | 0.225  | 0.984 *  | 0.999 *  | 0.986 *   | 1.000 *   | 0.996 *  | 1.002 *  | 1.007 * |
| 5000        | Uniform      | 0.7               | 0.273      | 0.249  | 0.247  | 0.245  | 0.948 *  | 0.980 *  | 0.951 *   | 0.960 *   | 0.957 *  | 0.962 *  | 0.965 * |
| 5000        | K1           | 0.7               | 1.523      | 0.263  | 0.240  | 0.282  | 0.425    | 0.377    | 0.930 *   | 0.968 *   | 0.979 *  | 0.978 *  | 0.907 * |
| 5000        | K2           | 0.7               | 3.462      | 0.287  | 0.229  | 0.433  | 0.265    | 0.231    | 0.891     | 0.937 *   | 1.009 *  | 1.007 *  | 0.746   |
| 5000        | $\chi^2_1$   | 0.7               | 1.837      | 0.289  | 0.272  | 1.530  | 0.939 *  | 0.799    | 0.968 *   | 1.008 *   | 1.005 *  | 1.012 *  | 0.995 * |
| 100         | Normal       | 0.9               | 17.688     | 31.343 | 24.919 | 15.465 | 0.902 *  | 0.830    | 1.055 *   | 1.019 *   | 1.004 *  | 0.950 *  | 0.935 * |
| 100         | Uniform      | 0.9               | 17.459     | 23.566 | 22.551 | 15.683 | 0.921 *  | 0.861    | 0.975 *   | 0.917 *   | 1.058 *  | 0.970 *  | 0.931 * |
| 100         | K1           | 0.9               | 15.767     | 31.750 | 68.194 | 19.909 | 0.913 *  | 0.772    | 0.949 *   | 0.920 *   | 0.871    | 0.552    | 0.918 * |
| 100         | K2           | 0.9               | 16.424     | 33.805 | 36.633 | 28.087 | 0.890    | 0.728    | 0.954 *   | 0.910 *   | 0.928 *  | 0.858    | 0.848   |
| 100         | $\chi^2_1$   | 0.9               | 19.446     | 47.267 | 38.101 | 23.423 | 0.813    | 0.678    | 1.004 *   | 1.000 *   | 0.989 *  | 0.905 *  | 0.903 * |
| 200         | Normal       | 0.9               | 6.666      | 7.499  | 7.372  | 6.340  | 0.964 *  | 0.932 *  | 0.960 *   | 0.941 *   | 0.971 *  | 0.939 *  | 0.988 * |
| 200         | Uniform      | 0.9               | 7.302      | 7.531  | 7.495  | 6.734  | 0.940 *  | 0.930 *  | 0.959 *   | 0.938 *   | 0.965 *  | 0.935 *  | 0.952 * |
| 200         | K1           | 0.9               | 6.343      | 8.379  | 8.722  | 7.251  | 0.932 *  | 0.819    | 0.947 *   | 0.945 *   | 0.951 *  | 0.908 *  | 0.970 * |
| 200         | K2           | 0.9               | 7.050      | 9.869  | 9.977  | 9.106  | 0.896    | 0.764    | 0.940 *   | 0.944 *   | 0.931 *  | 0.887    | 0.897   |
| 200         | $\chi^2_1$   | 0.9               | 7.159      | 13.750 | 11.079 | 9.155  | 0.877    | 0.756    | 0.900     | 0.920 *   | 0.938 *  | 0.913 *  | 0.950 * |
| 500         | Normal       | 0.9               | 2.504      | 2.597  | 2.565  | 2.414  | 0.968 *  | 0.967 *  | 0.966 *   | 0.968 *   | 0.973 *  | 0.965 *  | 0.990 * |
| 500         | Uniform      | 0.9               | 2.645      | 2.591  | 2.583  | 2.473  | 0.957 *  | 0.972 *  | 0.961 *   | 0.959 *   | 0.964 *  | 0.956 *  | 0.971 * |
| 500         | K1           | 0.9               | 2.516      | 2.786  | 2.727  | 2.637  | 0.939 *  | 0.836    | 0.956 *   | 0.971 *   | 0.970 *  | 0.952 *  | 0.970 * |
| 500         | K2           | 0.9               | 2.824      | 3.246  | 2.930  | 2.745  | 0.903 *  | 0.781    | 0.918 *   | 0.941 *   | 0.968 *  | 0.948 *  | 0.973 * |
| 500         | $\chi^2_1$   | 0.9               | 2.828      | 3.379  | 3.269  | 3.723  | 0.918 *  | 0.792    | 0.945 *   | 0.972 *   | 0.961 *  | 0.955 *  | 0.983 * |
| 1000        | Normal       | 0.9               | 1.222      | 1.231  | 1.231  | 1.212  | 0.966 *  | 0.972 *  | 0.970 *   | 0.978 *   | 0.974 *  | 0.973 *  | 0.980 * |
| 1000        | Uniform      | 0.9               | 1.227      | 1.174  | 1.171  | 1.153  | 0.987 *  | 1.012 *  | 0.989 *   | 0.993 *   | 0.992 *  | 0.990 *  | 0.996 * |
| 1000        | K1           | 0.9               | 1.632      | 1.271  | 1.213  | 1.218  | 0.871    | 0.771    | 0.967 *   | 0.991 *   | 0.997 *  | 0.988 *  | 0.993 * |
| 1000        | K2           | 0.9               | 1.790      | 1.376  | 1.282  | 1.356  | 0.912 *  | 0.788    | 0.946 *   | 0.978 *   | 0.987 *  | 0.979 *  | 0.991 * |
| 1000        | $\chi^2_1$   | 0.9               | 2.035      | 1.597  | 1.484  | 2.398  | 0.907 *  | 0.781    | 0.945 *   | 0.980 *   | 0.981 *  | 0.983 *  | 0.985 * |
| 5000        | Normal       | 0.9               | 0.228      | 0.229  | 0.227  | 0.224  | 0.992 *  | 1.007 *  | 0.993 *   | 1.007 *   | 1.001 *  | 1.007 *  | 1.010 * |
| 5000        | Uniform      | 0.9               | 0.251      | 0.233  | 0.232  | 0.231  | 0.981 *  | 1.015 *  | 0.982 *   | 0.992 *   | 0.987 *  | 0.992 *  | 0.993 * |
| 5000        | K1           | 0.9               | 1.213      | 0.249  | 0.228  | 0.258  | 0.522    | 0.464    | 0.950 *   | 0.986 *   | 1.003 *  | 1.003 *  | 0.946 * |
| 5000        | K2           | 0.9               | 2.789      | 0.262  | 0.233  | 0.450  | 0.309    | 0.273    | 0.930 *   | 0.976 *   | 0.997 *  | 0.997 *  | 0.736   |
| 5000        | $\chi^2_1$   | 0.9               | 1.724      | 0.301  | 0.282  | 1.467  | 0.916 *  | 0.782    | 0.948 *   | 0.989 *   | 0.985 *  | 0.995 *  | 1.003 * |

Note . ML means maximum likelihood, SB means Satorra-Bentler correction.\* means  $(0.9 \leq \text{Standard Error Ratio} \leq 1.1)$  criterion met.

Supplementary Table 3 (Continued)  
 Mean Squared Error and Standard Error Ratio of Lower Order Effect Estimates

| Sample Size | Distribution | Statistical Power | MSE    |        |        |        | $\gamma_2$ |          |           |           |          |          |         |
|-------------|--------------|-------------------|--------|--------|--------|--------|------------|----------|-----------|-----------|----------|----------|---------|
|             |              |                   | CPI    | GAPI   | UPI    | LMS    | CPI (ML)   | CPI (SB) | GAPI (ML) | GAPI (SB) | UPI (ML) | UPI (SB) | LMS     |
| 100         | Normal       | 0.7               | 16.108 | 21.247 | 22.559 | 15.794 | 0.909 *    | 0.839    | 0.927 *   | 0.878     | 0.913 *  | 0.842    | 0.917 * |
| 100         | Uniform      | 0.7               | 16.558 | 19.850 | 20.315 | 14.743 | 0.964 *    | 0.914 *  | 1.077 *   | 1.010 *   | 1.039 *  | 0.968 *  | 0.980 * |
| 100         | K1           | 0.7               | 19.043 | 23.905 | 30.215 | 21.021 | 0.844      | 0.712    | 0.993 *   | 0.951 *   | 1.416    | 1.188    | 0.898   |
| 100         | K2           | 0.7               | 19.047 | 34.087 | 38.490 | 25.075 | 0.871      | 0.715    | 1.019 *   | 1.011 *   | 1.103    | 1.019 *  | 0.924 * |
| 100         | $\chi^2_1$   | 0.7               | 21.648 | 37.449 | 66.115 | 23.890 | 0.809      | 0.661    | 1.055 *   | 1.021 *   | 1.128    | 1.129    | 0.906 * |
| 200         | Normal       | 0.7               | 6.589  | 7.222  | 7.156  | 6.351  | 0.969 *    | 0.943 *  | 0.975 *   | 0.959 *   | 0.979 *  | 0.947 *  | 0.989 * |
| 200         | Uniform      | 0.7               | 7.815  | 7.945  | 7.795  | 7.064  | 0.932 *    | 0.918 *  | 0.958 *   | 0.935 *   | 0.966 *  | 0.933 *  | 0.953 * |
| 200         | K1           | 0.7               | 6.361  | 9.412  | 8.589  | 10.546 | 0.934 *    | 0.815    | 0.904 *   | 0.898     | 0.942 *  | 0.893    | 0.828   |
| 200         | K2           | 0.7               | 7.360  | 11.563 | 11.434 | 8.271  | 0.872      | 0.740    | 0.898     | 0.905 *   | 0.902 *  | 0.873    | 0.928 * |
| 200         | $\chi^2_1$   | 0.7               | 6.675  | 13.016 | 11.411 | 8.717  | 0.896      | 0.765    | 0.895     | 0.899     | 0.936 *  | 0.910 *  | 0.936 * |
| 500         | Normal       | 0.7               | 2.394  | 2.427  | 2.408  | 2.330  | 0.981 *    | 0.980 *  | 0.988 *   | 0.988 *   | 0.995 *  | 0.985 *  | 1.003 * |
| 500         | Uniform      | 0.7               | 2.653  | 2.581  | 2.554  | 2.447  | 0.963 *    | 0.979 *  | 0.965 *   | 0.963 *   | 0.971 *  | 0.963 *  | 0.979 * |
| 500         | K1           | 0.7               | 2.565  | 3.028  | 2.818  | 2.728  | 0.911 *    | 0.808    | 0.930 *   | 0.947 *   | 0.959 *  | 0.940 *  | 0.954 * |
| 500         | K2           | 0.7               | 2.937  | 3.093  | 2.802  | 2.696  | 0.901 *    | 0.771    | 0.929 *   | 0.949 *   | 0.977 *  | 0.952 *  | 0.977 * |
| 500         | $\chi^2_1$   | 0.7               | 3.219  | 3.850  | 3.555  | 3.966  | 0.894      | 0.769    | 0.904 *   | 0.930 *   | 0.933 *  | 0.926 *  | 0.968 * |
| 1000        | Normal       | 0.7               | 1.260  | 1.282  | 1.276  | 1.242  | 0.952 *    | 0.959 *  | 0.952 *   | 0.959 *   | 0.957 *  | 0.955 *  | 0.967 * |
| 1000        | Uniform      | 0.7               | 1.220  | 1.150  | 1.145  | 1.128  | 1.000 *    | 1.025 *  | 1.005 *   | 1.009 *   | 1.009 *  | 1.007 *  | 1.013 * |
| 1000        | K1           | 0.7               | 1.649  | 1.350  | 1.261  | 1.267  | 0.845      | 0.751    | 0.941 *   | 0.963 *   | 0.978 *  | 0.969 *  | 0.966 * |
| 1000        | K2           | 0.7               | 2.479  | 1.299  | 1.237  | 1.347  | 0.716      | 0.616    | 0.975 *   | 1.004 *   | 1.007 *  | 0.994 *  | 0.971 * |
| 1000        | $\chi^2_1$   | 0.7               | 2.334  | 1.611  | 1.519  | 2.551  | 0.921 *    | 0.790    | 0.943 *   | 0.976 *   | 0.973 *  | 0.974 *  | 0.995 * |
| 5000        | Normal       | 0.7               | 0.245  | 0.244  | 0.245  | 0.245  | 0.957 *    | 0.972 *  | 0.961 *   | 0.974 *   | 0.964 *  | 0.969 *  | 0.967 * |
| 5000        | Uniform      | 0.7               | 0.241  | 0.221  | 0.221  | 0.220  | 1.005 *    | 1.038 *  | 1.007 *   | 1.018 *   | 1.011 *  | 1.017 *  | 1.019 * |
| 5000        | K1           | 0.7               | 1.585  | 0.237  | 0.219  | 0.264  | 0.425      | 0.377    | 0.973 *   | 1.012 *   | 1.024 *  | 1.023 *  | 0.941 * |
| 5000        | K2           | 0.7               | 3.315  | 0.261  | 0.229  | 0.373  | 0.276      | 0.241    | 0.935 *   | 0.974 *   | 1.009 *  | 1.007 *  | 0.805   |
| 5000        | $\chi^2_1$   | 0.7               | 1.810  | 0.300  | 0.281  | 1.486  | 0.920 *    | 0.785    | 0.951 *   | 0.995 *   | 0.988 *  | 0.999 *  | 0.999 * |
| 100         | Normal       | 0.9               | 16.247 | 22.030 | 20.083 | 15.588 | 0.933 *    | 0.860    | 1.078 *   | 1.031 *   | 1.014 *  | 0.938 *  | 0.931 * |
| 100         | Uniform      | 0.9               | 17.813 | 25.790 | 24.367 | 15.809 | 0.907 *    | 0.849    | 0.941 *   | 0.883     | 1.000 *  | 0.919 *  | 0.923 * |
| 100         | K1           | 0.9               | 17.650 | 24.808 | 27.268 | 21.363 | 0.861      | 0.728    | 0.990 *   | 0.956 *   | 1.071 *  | 0.846    | 0.861   |
| 100         | K2           | 0.9               | 19.840 | 38.229 | 36.607 | 25.093 | 0.819      | 0.674    | 0.895     | 0.866     | 0.965 *  | 0.908 *  | 0.862   |
| 100         | $\chi^2_1$   | 0.9               | 18.774 | 42.969 | 33.185 | 25.285 | 0.817      | 0.691    | 1.069 *   | 1.057 *   | 0.965 *  | 0.896    | 0.891   |
| 200         | Normal       | 0.9               | 6.295  | 6.967  | 6.831  | 6.219  | 0.983 *    | 0.950 *  | 0.981 *   | 0.959 *   | 0.991 *  | 0.957 *  | 0.990 * |
| 200         | Uniform      | 0.9               | 6.674  | 7.002  | 6.950  | 6.183  | 0.986 *    | 0.975 *  | 1.002 *   | 0.983 *   | 1.011 *  | 0.983 *  | 0.997 * |
| 200         | K1           | 0.9               | 6.035  | 8.028  | 7.640  | 6.958  | 0.960 *    | 0.840    | 0.974 *   | 0.966 *   | 1.006 *  | 0.957 *  | 0.993 * |
| 200         | K2           | 0.9               | 7.458  | 10.466 | 9.572  | 8.951  | 0.872      | 0.740    | 0.913 *   | 0.911 *   | 0.936 *  | 0.885    | 0.895   |
| 200         | $\chi^2_1$   | 0.9               | 6.768  | 13.702 | 11.727 | 8.832  | 0.889      | 0.769    | 0.878     | 0.892     | 0.906 *  | 0.879    | 0.940 * |
| 500         | Normal       | 0.9               | 2.447  | 2.524  | 2.497  | 2.386  | 0.967 *    | 0.967 *  | 0.968 *   | 0.972 *   | 0.975 *  | 0.968 *  | 0.984 * |
| 500         | Uniform      | 0.9               | 2.629  | 2.570  | 2.548  | 2.402  | 0.972 *    | 0.987 *  | 0.972 *   | 0.970 *   | 0.979 *  | 0.970 *  | 0.994 * |
| 500         | K1           | 0.9               | 2.617  | 3.070  | 2.852  | 2.680  | 0.908 *    | 0.806    | 0.914 *   | 0.925 *   | 0.952 *  | 0.932 *  | 0.964 * |
| 500         | K2           | 0.9               | 2.886  | 3.172  | 2.987  | 2.825  | 0.897      | 0.772    | 0.924 *   | 0.947 *   | 0.952 *  | 0.934 *  | 0.959 * |
| 500         | $\chi^2_1$   | 0.9               | 2.790  | 3.203  | 3.068  | 3.634  | 0.946 *    | 0.818    | 0.963 *   | 0.989 *   | 0.984 *  | 0.979 *  | 1.022 * |
| 1000        | Normal       | 0.9               | 1.272  | 1.281  | 1.269  | 1.245  | 0.948 *    | 0.954 *  | 0.954 *   | 0.962 *   | 0.962 *  | 0.961 *  | 0.967 * |
| 1000        | Uniform      | 0.9               | 1.324  | 1.263  | 1.249  | 1.217  | 0.958 *    | 0.984 *  | 0.961 *   | 0.966 *   | 0.968 *  | 0.967 *  | 0.977 * |
| 1000        | K1           | 0.9               | 1.570  | 1.280  | 1.160  | 1.154  | 0.887      | 0.786    | 0.967 *   | 0.993 *   | 1.023 *  | 1.016 *  | 1.021 * |
| 1000        | K2           | 0.9               | 1.780  | 1.427  | 1.337  | 1.462  | 0.906 *    | 0.782    | 0.925 *   | 0.952 *   | 0.962 *  | 0.951 *  | 1.384   |
| 1000        | $\chi^2_1$   | 0.9               | 2.152  | 1.669  | 1.579  | 2.575  | 0.911 *    | 0.780    | 0.923 *   | 0.955 *   | 0.952 *  | 0.952 *  | 0.964 * |
| 5000        | Normal       | 0.9               | 0.233  | 0.234  | 0.232  | 0.231  | 0.981 *    | 0.996 *  | 0.980 *   | 0.994 *   | 0.988 *  | 0.993 *  | 0.994 * |
| 5000        | Uniform      | 0.9               | 0.253  | 0.229  | 0.229  | 0.227  | 0.990 *    | 1.023 *  | 0.992 *   | 1.002 *   | 0.996 *  | 1.001 *  | 1.002 * |
| 5000        | K1           | 0.9               | 1.190  | 0.252  | 0.225  | 0.262  | 0.523      | 0.466    | 0.947 *   | 0.984 *   | 1.011 *  | 1.012 *  | 0.938 * |
| 5000        | K2           | 0.9               | 2.625  | 0.251  | 0.230  | 0.346  | 0.323      | 0.284    | 0.954 *   | 0.999 *   | 1.007 *  | 1.006 *  | 0.838   |
| 5000        | $\chi^2_1$   | 0.9               | 1.770  | 0.306  | 0.289  | 1.526  | 0.911 *    | 0.777    | 0.938 *   | 0.978 *   | 0.973 *  | 0.982 *  | 0.980 * |

Note . ML means maximum likelihood, SB means Satorra-Bentler correction.\* means  $(0.9 \leq \text{Standard Error Ratio} \leq 1.1)$  criterion met.
