# Supplementary material
Source: PubMed Central journal article supplement (PMC3583564)
Supplement: NIHMS405516-supplement-table_4.pdf [file NIHMS405516-supplement-table_4.pdf]

Supplementary Table 4

Coverage and Non-Coverage Rates of the Lower Order Effects

| Sample          | Statistical | $\alpha$ |              |         |          |                 |                 |          |                 |                 |          |                 |                 |          |                 |                 |          |                 |                 |          |                 |                 |
|-----------------|-------------|----------|--------------|---------|----------|-----------------|-----------------|----------|-----------------|-----------------|----------|-----------------|-----------------|----------|-----------------|-----------------|----------|-----------------|-----------------|----------|-----------------|-----------------|
|                 |             | CPI      |              |         |          |                 |                 | GAPI     |                 |                 |          |                 |                 | UPI      |                 |                 |          |                 |                 | LMS      |                 |                 |
|                 |             | Size     | Distribution | Power   | cov (ML) | > $\alpha$ (ML) | < $\alpha$ (ML) | cov (SB) | > $\alpha$ (SB) | < $\alpha$ (SB) | cov (ML) | > $\alpha$ (ML) | < $\alpha$ (ML) | cov (SB) | > $\alpha$ (SB) | < $\alpha$ (SB) | cov (ML) | > $\alpha$ (ML) | < $\alpha$ (ML) | cov (ML) | > $\alpha$ (ML) | < $\alpha$ (ML) |
| 100 Normal      | 0.7         | 0.915 *  | 0.039        | 0.046   | 0.901 *  | 0.047           | 0.052           | 0.935 *  | 0.031 *         | 0.034 *         | 0.922 *  | 0.039           | 0.039           | 0.932 *  | 0.035 *         | 0.033 *         | 0.918 *  | 0.041           | 0.041           | 0.915 *  | 0.042           | 0.043           |
| 100 Uniform     | 0.7         | 0.929 *  | 0.051        | 0.020 * | 0.903 *  | 0.066           | 0.031 *         | 0.956 *  | 0.032 *         | 0.012           | 0.937 *  | 0.043           | 0.020 *         | 0.958 *  | 0.031 *         | 0.011           | 0.939 *  | 0.044           | 0.017 *         | 0.916 *  | 0.056           | 0.028 *         |
| 100 K1          | 0.7         | 0.922 *  | 0.026 *      | 0.052   | 0.915 *  | 0.028 *         | 0.057           | 0.920 *  | 0.039           | 0.041           | 0.904 *  | 0.048           | 0.048           | 0.924 *  | 0.042           | 0.034 *         | 0.910 *  | 0.047           | 0.043           | 0.931 *  | 0.027 *         | 0.042           |
| 100 K2          | 0.7         | 0.929 *  | 0.021 *      | 0.050   | 0.924 *  | 0.021 *         | 0.055           | 0.942 *  | 0.030 *         | 0.028 *         | 0.929 *  | 0.039           | 0.032 *         | 0.946 *  | 0.028 *         | 0.026 *         | 0.933 *  | 0.038           | 0.029 *         | 0.935 *  | 0.022 *         | 0.043           |
| 100 $\chi^2_1$  | 0.7         | 0.915 *  | 0.019 *      | 0.066   | 0.917 *  | 0.022 *         | 0.061           | 0.942 *  | 0.036 *         | 0.022 *         | 0.929 *  | 0.042           | 0.029 *         | 0.940 *  | 0.039           | 0.021 *         | 0.926 *  | 0.048           | 0.026 *         | 0.923 *  | 0.015 *         | 0.062           |
| 200 Normal      | 0.7         | 0.934 *  | 0.039        | 0.027 * | 0.929 *  | 0.039           | 0.032 *         | 0.938 *  | 0.035 *         | 0.027 *         | 0.931 *  | 0.038           | 0.031 *         | 0.934 *  | 0.039           | 0.027 *         | 0.928 *  | 0.044           | 0.028 *         | 0.926 *  | 0.039           | 0.035 *         |
| 200 Uniform     | 0.7         | 0.936 *  | 0.037        | 0.027 * | 0.916 *  | 0.047           | 0.037           | 0.941 *  | 0.031 *         | 0.028 *         | 0.935 *  | 0.034 *         | 0.031 *         | 0.944 *  | 0.030 *         | 0.026 *         | 0.936 *  | 0.035 *         | 0.029 *         | 0.935 *  | 0.034 *         | 0.031 *         |
| 200 K1          | 0.7         | 0.937 *  | 0.017 *      | 0.046   | 0.939 *  | 0.019 *         | 0.042           | 0.939 *  | 0.031 *         | 0.030 *         | 0.934 *  | 0.033 *         | 0.033 *         | 0.934 *  | 0.033 *         | 0.033 *         | 0.925 *  | 0.039           | 0.036 *         | 0.938 *  | 0.023 *         | 0.039           |
| 200 K2          | 0.7         | 0.939 *  | 0.018 *      | 0.043   | 0.951 *  | 0.017 *         | 0.032 *         | 0.930 *  | 0.042           | 0.028 *         | 0.923 *  | 0.044           | 0.033 *         | 0.934 *  | 0.041           | 0.025 *         | 0.925 *  | 0.043           | 0.032 *         | 0.939 *  | 0.025 *         | 0.036 *         |
| 200 $\chi^2_1$  | 0.7         | 0.886    | 0.015 *      | 0.099   | 0.898    | 0.013           | 0.089           | 0.920 *  | 0.038           | 0.042           | 0.912 *  | 0.042           | 0.046           | 0.917 *  | 0.041           | 0.042           | 0.914 *  | 0.041           | 0.045           | 0.887    | 0.013           | 0.100           |
| 500 Normal      | 0.7         | 0.943 *  | 0.026 *      | 0.031 * | 0.938 *  | 0.029 *         | 0.033 *         | 0.943 *  | 0.024 *         | 0.033 *         | 0.942 *  | 0.025 *         | 0.033 *         | 0.943 *  | 0.025 *         | 0.032 *         | 0.943 *  | 0.026 *         | 0.031 *         | 0.935 *  | 0.029 *         | 0.036 *         |
| 500 Uniform     | 0.7         | 0.931 *  | 0.041        | 0.028 * | 0.922 *  | 0.048           | 0.030 *         | 0.939 *  | 0.031 *         | 0.030 *         | 0.943 *  | 0.029 *         | 0.028 *         | 0.936 *  | 0.033 *         | 0.031 *         | 0.938 *  | 0.032 *         | 0.030 *         | 0.942 *  | 0.034 *         | 0.024 *         |
| 500 K1          | 0.7         | 0.932 *  | 0.018 *      | 0.050   | 0.954 *  | 0.012           | 0.034 *         | 0.928 *  | 0.046           | 0.026 *         | 0.923 *  | 0.049           | 0.028 *         | 0.929 *  | 0.044           | 0.027 *         | 0.926 *  | 0.047           | 0.027 *         | 0.935 *  | 0.030 *         | 0.035 *         |
| 500 K2          | 0.7         | 0.920 *  | 0.017 *      | 0.063   | 0.942 *  | 0.013           | 0.045           | 0.924 *  | 0.034 *         | 0.042           | 0.924 *  | 0.033 *         | 0.043           | 0.924 *  | 0.035 *         | 0.041           | 0.924 *  | 0.035 *         | 0.041           | 0.926 *  | 0.022 *         | 0.052           |
| 500 $\chi^2_1$  | 0.7         | 0.833    | 0.006        | 0.161   | 0.873    | 0.002           | 0.125           | 0.930 *  | 0.032 *         | 0.038           | 0.928 *  | 0.034 *         | 0.038           | 0.928 *  | 0.034 *         | 0.036 *         | 0.930 *  | 0.034 *         | 0.036 *         | 0.830    | 0.004           | 0.166           |
| 1000 Normal     | 0.7         | 0.927 *  | 0.030 *      | 0.043   | 0.925 *  | 0.031 *         | 0.044           | 0.928 *  | 0.032 *         | 0.040           | 0.929 *  | 0.031 *         | 0.040           | 0.927 *  | 0.032 *         | 0.041           | 0.928 *  | 0.033 *         | 0.039           | 0.925 *  | 0.027 *         | 0.048           |
| 1000 Uniform    | 0.7         | 0.929 *  | 0.035 *      | 0.036 * | 0.924 *  | 0.037           | 0.039           | 0.932 *  | 0.031 *         | 0.037           | 0.936 *  | 0.030 *         | 0.034 *         | 0.932 *  | 0.031 *         | 0.037           | 0.934 *  | 0.030 *         | 0.036 *         | 0.925 *  | 0.038           | 0.037           |
| 1000 K1         | 0.7         | 0.929 *  | 0.019 *      | 0.052   | 0.951 *  | 0.014 *         | 0.035 *         | 0.934 *  | 0.035 *         | 0.031 *         | 0.933 *  | 0.036 *         | 0.031 *         | 0.933 *  | 0.035 *         | 0.032 *         | 0.932 *  | 0.036 *         | 0.032 *         | 0.934 *  | 0.025 *         | 0.041           |
| 1000 K2         | 0.7         | 0.921 *  | 0.013        | 0.066   | 0.952 *  | 0.008           | 0.040           | 0.934 *  | 0.035 *         | 0.031 *         | 0.933 *  | 0.034 *         | 0.033 *         | 0.934 *  | 0.034 *         | 0.032 *         | 0.933 *  | 0.033 *         | 0.034 *         | 0.927 *  | 0.018 *         | 0.055           |
| 1000 $\chi^2_1$ | 0.7         | 0.765    | 0.002        | 0.233   | 0.814    | 0.001           | 0.185           | 0.926 *  | 0.032 *         | 0.042           | 0.928 *  | 0.031 *         | 0.041           | 0.925 *  | 0.032 *         | 0.043           | 0.921 *  | 0.034 *         | 0.045           | 0.753    | 0.002           | 0.245           |
| 5000 Normal     | 0.7         | 0.926 *  | 0.039        | 0.035 * | 0.927 *  | 0.039           | 0.034 *         | 0.924 *  | 0.038           | 0.038           | 0.925 *  | 0.039           | 0.036 *         | 0.924 *  | 0.038           | 0.038           | 0.925 *  | 0.038           | 0.037           | 0.920 *  | 0.042           | 0.038           |
| 5000 Uniform    | 0.7         | 0.942 *  | 0.033 *      | 0.025 * | 0.936 *  | 0.035 *         | 0.029 *         | 0.936 *  | 0.031 *         | 0.033 *         | 0.937 *  | 0.031 *         | 0.032 *         | 0.937 *  | 0.031 *         | 0.032 *         | 0.939 *  | 0.031 *         | 0.030 *         | 0.934 *  | 0.029 *         | 0.052           |
| 5000 K1         | 0.7         | 0.909 *  | 0.015 *      | 0.076   | 0.944 *  | 0.006           | 0.050           | 0.926 *  | 0.035 *         | 0.039           | 0.926 *  | 0.035 *         | 0.039           | 0.926 *  | 0.035 *         | 0.039           | 0.926 *  | 0.035 *         | 0.039           | 0.927 *  | 0.021 *         | 0.052           |
| 5000 K2         | 0.7         | 0.916 *  | 0.014 *      | 0.070   | 0.956 *  | 0.009           | 0.035 *         | 0.938 *  | 0.032 *         | 0.030 *         | 0.938 *  | 0.032 *         | 0.030 *         | 0.937 *  | 0.033 *         | 0.030 *         | 0.938 *  | 0.033 *         | 0.029 *         | 0.936 *  | 0.017 *         | 0.047           |
| 5000 $\chi^2_1$ | 0.7         | 0.390    | 0.000        | 0.610   | 0.478    | 0.000           | 0.522           | 0.933 *  | 0.035 *         | 0.032 *         | 0.935 *  | 0.035 *         | 0.030 *         | 0.933 *  | 0.035 *         | 0.032 *         | 0.935 *  | 0.034 *         | 0.031 *         | 0.332    | 0.000           | 0.668           |
| 100 Normal      | 0.9         | 0.932 *  | 0.039        | 0.029 * | 0.922 *  | 0.045           | 0.033 *         | 0.948 *  | 0.030 *         | 0.022 *         | 0.940 *  | 0.034 *         | 0.026 *         | 0.946 *  | 0.036 *         | 0.018 *         | 0.933 *  | 0.043           | 0.024 *         | 0.926 *  | 0.045           | 0.029 *         |
| 100 Uniform     | 0.9         | 0.919 *  | 0.051        | 0.030 * | 0.891    | 0.069           | 0.040           | 0.950 *  | 0.026 *         | 0.024 *         | 0.936 *  | 0.033 *         | 0.031 *         | 0.945 *  | 0.034 *         | 0.021 *         | 0.935 *  | 0.040           | 0.025 *         | 0.915 *  | 0.050           | 0.035 *         |
| 100 K1          | 0.9         | 0.926 *  | 0.027 *      | 0.047   | 0.924 *  | 0.027 *         | 0.049           | 0.933 *  | 0.035 *         | 0.032 *         | 0.923 *  | 0.041           | 0.036 *         | 0.929 *  | 0.041           | 0.030 *         | 0.915 *  | 0.049           | 0.036 *         | 0.933 *  | 0.030 *         | 0.037           |
| 100 K2          | 0.9         | 0.918 *  | 0.027 *      | 0.055   | 0.915 *  | 0.031 *         | 0.054           | 0.926 *  | 0.039           | 0.035 *         | 0.918 *  | 0.044           | 0.038           | 0.924 *  | 0.041           | 0.035 *         | 0.910 *  | 0.049           | 0.041           | 0.917 *  | 0.031 *         | 0.052           |
| 100 $\chi^2_1$  | 0.9         | 0.900    | 0.015 *      | 0.085   | 0.910 *  | 0.016 *         | 0.074           | 0.931 *  | 0.037           | 0.032 *         | 0.921 *  | 0.044           | 0.035 *         | 0.929 *  | 0.040           | 0.031 *         | 0.917 *  | 0.049           | 0.034 *         | 0.917 *  | 0.012           | 0.071           |
| 200 Normal      | 0.9         | 0.941 *  | 0.030 *      | 0.029 * | 0.925 *  | 0.040           | 0.035 *         | 0.941 *  | 0.028 *         | 0.031 *         | 0.934 *  | 0.031 *         | 0.035 *         | 0.937 *  | 0.031 *         | 0.032 *         | 0.937 *  | 0.034 *         | 0.029 *         | 0.929 *  | 0.030 *         | 0.041           |
| 200 Uniform     | 0.9         | 0.937 *  | 0.039        | 0.024 * | 0.923 *  | 0.047           | 0.030 *         | 0.941 *  | 0.035 *         | 0.024 *         | 0.932 *  | 0.041           | 0.027 *         | 0.943 *  | 0.033 *         | 0.024 *         | 0.935 *  | 0.039           | 0.026 *         | 0.938 *  | 0.038           | 0.024 *         |
| 200 K1          | 0.9         | 0.927 *  | 0.016 *      | 0.057   | 0.943 *  | 0.012           | 0.045           | 0.940 *  | 0.032 *         | 0.028 *         | 0.936 *  | 0.035 *         | 0.029 *         | 0.937 *  | 0.038           | 0.025 *         | 0.931 *  | 0.042           | 0.027 *         | 0.931 *  | 0.027 *         | 0.042           |
| 200 K2          | 0.9         | 0.922 *  | 0.015 *      | 0.063   | 0.933 *  | 0.013           | 0.054           | 0.931 *  | 0.032 *         | 0.037           | 0.925 *  | 0.036 *         | 0.039           | 0.924 *  | 0.039           | 0.037           | 0.918 *  | 0.044           | 0.038           | 0.932 *  | 0.021 *         | 0.047           |
| 200 $\chi^2_1$  | 0.9         | 0.896    | 0.008        | 0.096   | 0.912 *  | 0.008           | 0.080           | 0.929 *  | 0.043           | 0.028 *         | 0.922 *  | 0.048           | 0.030 *         | 0.921 *  | 0.050           | 0.029 *         | 0.919 *  | 0.052           | 0.029 *         | 0.905 *  | 0.009           | 0.086           |
| 500 Normal      | 0.9         | 0.951 *  | 0.024 *      | 0.025 * | 0.949 *  | 0.025 *         | 0.026 *         | 0.947 *  | 0.027 *         | 0.026 *         | 0.944 *  | 0.028 *         | 0.028 *         | 0.946 *  | 0.027 *         | 0.027 *         | 0.945 *  | 0.027 *         | 0.028 *         | 0.945 *  | 0.032 *         | 0.023 *         |
| 500 Uniform     | 0.9         | 0.926 *  | 0.042        | 0.032 * | 0.915 *  | 0.049           | 0.036 *         | 0.930 *  | 0.035 *         | 0.035 *         | 0.926 *  | 0.036 *         | 0.038           | 0.928 *  | 0.037           | 0.035 *         | 0.927 *  | 0.036 *         | 0.037           | 0.924 *  | 0.043           | 0.033 *         |
| 500 K1          | 0.9         | 0.893    | 0.021 *      | 0.086   | 0.916 *  | 0.020 *         | 0.064           | 0.918 *  | 0.040           | 0.042           | 0.916 *  | 0.041           | 0.043           | 0.920 *  | 0.039           | 0.041           | 0.920 *  | 0.039           | 0.041           | 0.902 *  | 0.027 *         | 0.071           |
| 500 K2          | 0.9         | 0.923 *  | 0.013        | 0.064   | 0.940 *  | 0.010           | 0.050           | 0.929 *  | 0.037           | 0.034 *         | 0.925 *  | 0.038           | 0.037           | 0.928 *  | 0.038           | 0.034 *         | 0.926 *  | 0.039           | 0.035 *         | 0.935 *  | 0.017 *         | 0.048           |
| 500 $\chi^2_1$  | 0.9         | 0.832    | 0.005        | 0.163   | 0.870    | 0.003           | 0.127           | 0.924 *  | 0.039           | 0.037           | 0.923 *  | 0.041           | 0.036 *         | 0.924 *  | 0.040           | 0.036 *         | 0.922 *  | 0.042           | 0.036 *         | 0.831    | 0.004           | 0.165           |
| 1000 Normal     | 0.9         | 0.927 *  | 0.037        | 0.036 * | 0.924 *  | 0.038           | 0.038           | 0.927 *  | 0.037           | 0.036 *         | 0.926 *  | 0.038           | 0.036 *         | 0.926 *  | 0.039           | 0.035 *         | 0.927 *  | 0.038           | 0.035 *         | 0.926 *  | 0.039           | 0.035 *         |
| 1000 Uniform    | 0.9         | 0.936 *  | 0.037        | 0.027 * | 0.927 *  | 0.042           | 0.031 *         | 0.939 *  | 0.028 *         | 0.033 *         | 0.940 *  | 0.030 *         | 0.030 *         | 0.938 *  | 0.028 *         | 0.034 *         | 0.941 *  | 0.028 *         | 0.031 *         | 0.943 *  | 0.033 *         | 0.024 *         |
| 1000 K1         | 0.9         | 0.918 *  | 0.013        | 0.069   | 0.942 *  | 0.011           | 0.047           | 0.943 *  | 0.028 *         | 0.029 *         | 0.945 *  | 0.027 *         | 0.028 *         | 0.941 *  | 0.030 *         | 0.029 *         | 0.941 *  | 0.029 *         | 0.030 *         | 0.939 *  | 0.015 *         | 0.046           |
| 1000 K2         | 0.9         | 0.915 *  | 0.007        | 0.078   | 0.947 *  | 0.004           | 0.049           | 0.942 *  | 0.026 *         | 0.032 *         | 0.944 *  | 0.024 *         | 0.032 *         | 0.944 *  | 0.023 *         | 0.033 *         | 0.943 *  | 0.024 *         | 0.033 *         | 0.930 *  | 0.009           | 0.061           |
| 1000 $\chi^2_1$ | 0.9         | 0.738    | 0.002        | 0.260   | 0.802    | 0.001           | 0.197           | 0.924 *  | 0.039           | 0.037           | 0.924 *  | 0.038           | 0.038           | 0.923 *  | 0.038           | 0.039           | 0.924 *  | 0.038           | 0.038           | 0.740    | 0.001           | 0.259           |
| 5000 Normal     | 0.9         | 0.922 *  | 0.040        | 0.038   | 0.920 *  | 0.041           | 0.039           | 0.921 *  | 0.042           | 0.037           | 0.921 *  | 0.042           | 0.037           | 0.920 *  | 0.042           | 0.038           | 0.922 *  | 0.041           | 0.037           | 0.920 *  | 0.041           | 0.039           |
| 5000 Uniform    | 0.9         | 0.923 *  | 0.038        | 0.039   | 0.921 *  | 0.039           | 0.040           | 0.924 *  | 0.032 *         | 0.044           | 0.925 *  | 0.031 *         | 0.044           | 0.923 *  | 0.032 *         | 0.045           | 0.926 *  | 0.031 *         | 0.043           | 0.928 *  | 0.032 *         | 0.040           |
| 5000 K1         | 0.9         | 0.919 *  | 0.008        | 0.073   | 0.952 *  | 0.006           | 0.042           | 0.935 *  | 0.035 *         | 0.030 *         | 0.934 *  | 0.036 *         | 0.030 *         | 0.935 *  | 0.035 *         | 0.030 *         | 0.935 *  | 0.035 *         | 0.030 *         | 0.929 *  | 0.013           | 0.058           |
| 5000 K2         | 0.9         | 0.894    | 0.014 *      | 0.092   | 0.949 *  | 0.004           | 0.047           | 0.929 *  | 0.035 *         | 0.036 *         | 0.929 *  | 0.036 *         | 0.035 *         | 0.926 *  | 0.036 *         | 0.038           | 0.926 *  | 0.036 *         | 0.038           | 0.925 *  | 0.020 *         | 0.055           |
| 5000 $\chi^2_1$ | 0.9         | 0.397    | 0.001        | 0.602   | 0.494    | 0.000           | 0.506           | 0.932 *  | 0.041           | 0.027 *         | 0.934 *  | 0.040           | 0.026 *         | 0.932 *  | 0.041           | 0.027 *         | 0.931 *  | 0.042           | 0.027 *         | 0.341    | 0.000           | 0.659           |

Note. ML means maximum likelihood. SB means Satorra-Bentler correction. cov means coverage rate. For coverage rate, \* means (Coverage Rate &gt; 0.9) criterion met.

(<  $\alpha$ ) means the non-coverage rate smaller than  $\alpha$ . (>  $\alpha$ ) means the non-coverage rate greater than  $\alpha$ . For non-coverage rate, \* means the non-coverage

Supplementary Table 4 (Continued)

Coverage and Non-Coverage Rates of the Lower Order Effects

| Sample Size     | Distribution | Statistical Power | $\gamma_1$ |                   |                   |          |                   |                   |          |                   |                   |          |                   |                   |          |                   |                   |          |                   |                   |          |                   |
|-----------------|--------------|-------------------|------------|-------------------|-------------------|----------|-------------------|-------------------|----------|-------------------|-------------------|----------|-------------------|-------------------|----------|-------------------|-------------------|----------|-------------------|-------------------|----------|-------------------|
|                 |              |                   | CPI        |                   |                   |          |                   |                   | GAPI     |                   |                   |          |                   |                   | UPI      |                   |                   |          |                   |                   | LMS      |                   |
|                 |              |                   | cov (ML)   | > $\gamma_1$ (ML) | < $\gamma_1$ (ML) | cov (SB) | > $\gamma_1$ (SB) | < $\gamma_1$ (SB) | cov (ML) | > $\gamma_1$ (ML) | < $\gamma_1$ (ML) | cov (SB) | > $\gamma_1$ (SB) | < $\gamma_1$ (SB) | cov (ML) | > $\gamma_1$ (ML) | < $\gamma_1$ (ML) | cov (SB) | > $\gamma_1$ (SB) | < $\gamma_1$ (SB) | cov (ML) | > $\gamma_1$ (ML) |
| 100 Normal      | 0.7          | 0.943 *           | 0.009      | 0.048             | 0.919 *           | 0.013    | 0.068             | 0.952 *           | 0.006    | 0.042             | 0.937 *           | 0.007    | 0.056             | 0.952 *           | 0.006    | 0.042             | 0.933 *           | 0.011    | 0.056             | 0.936 *           | 0.008    | 0.056             |
| 100 Uniform     | 0.7          | 0.935 *           | 0.012      | 0.053             | 0.921 *           | 0.015 *  | 0.064             | 0.947 *           | 0.008    | 0.045             | 0.930 *           | 0.011    | 0.059             | 0.948 *           | 0.006    | 0.046             | 0.936 *           | 0.010    | 0.054             | 0.938 *           | 0.010    | 0.052             |
| 100 K1          | 0.7          | 0.924 *           | 0.012      | 0.064             | 0.856             | 0.033 *  | 0.111             | 0.952 *           | 0.015 *  | 0.033 *           | 0.934 *           | 0.021 *  | 0.045             | 0.957 *           | 0.010    | 0.033 *           | 0.932 *           | 0.022 *  | 0.046             | 0.941 *           | 0.008    | 0.051             |
| 100 K2          | 0.7          | 0.913 *           | 0.012      | 0.075             | 0.819             | 0.043    | 0.138             | 0.939 *           | 0.019 *  | 0.042             | 0.932 *           | 0.017 *  | 0.051             | 0.947 *           | 0.014 *  | 0.039             | 0.924 *           | 0.022 *  | 0.054             | 0.931 *           | 0.008    | 0.061             |
| 100 $\chi^2_1$  | 0.7          | 0.931 *           | 0.012      | 0.057             | 0.858             | 0.037    | 0.105             | 0.954 *           | 0.009    | 0.037             | 0.943 *           | 0.015 *  | 0.042             | 0.958 *           | 0.005    | 0.037             | 0.931 *           | 0.022 *  | 0.047             | 0.927 *           | 0.006    | 0.067             |
| 200 Normal      | 0.7          | 0.943 *           | 0.013      | 0.044             | 0.935 *           | 0.017 *  | 0.048             | 0.950 *           | 0.014 *  | 0.036 *           | 0.940 *           | 0.016 *  | 0.044             | 0.948 *           | 0.011    | 0.041             | 0.939 *           | 0.015 *  | 0.046             | 0.942 *           | 0.013    | 0.045             |
| 200 Uniform     | 0.7          | 0.951 *           | 0.015 *    | 0.034 *           | 0.951 *           | 0.014 *  | 0.035 *           | 0.954 *           | 0.012    | 0.034 *           | 0.953 *           | 0.011    | 0.036 *           | 0.955 *           | 0.012    | 0.033 *           | 0.950 *           | 0.011    | 0.039             | 0.954 *           | 0.012    | 0.034 *           |
| 200 K1          | 0.7          | 0.908 *           | 0.015 *    | 0.077             | 0.848             | 0.028 *  | 0.124             | 0.935 *           | 0.022 *  | 0.043             | 0.925 *           | 0.023 *  | 0.052             | 0.941 *           | 0.019 *  | 0.040             | 0.923 *           | 0.025 *  | 0.052             | 0.938 *           | 0.013    | 0.049             |
| 200 K2          | 0.7          | 0.902 *           | 0.012      | 0.086             | 0.830             | 0.022 *  | 0.148             | 0.945 *           | 0.018 *  | 0.037             | 0.939 *           | 0.017 *  | 0.044             | 0.953 *           | 0.016 *  | 0.031 *           | 0.942 *           | 0.021 *  | 0.037             | 0.945 *           | 0.013    | 0.042             |
| 200 $\chi^2_1$  | 0.7          | 0.905 *           | 0.021 *    | 0.074             | 0.840             | 0.034 *  | 0.126             | 0.938 *           | 0.027 *  | 0.035 *           | 0.940 *           | 0.025 *  | 0.035 *           | 0.947 *           | 0.019 *  | 0.034 *           | 0.942 *           | 0.027 *  | 0.031 *           | 0.931 *           | 0.008    | 0.061             |
| 500 Normal      | 0.7          | 0.953 *           | 0.017 *    | 0.030 *           | 0.954 *           | 0.015 *  | 0.031 *           | 0.959 *           | 0.017 *  | 0.024 *           | 0.956 *           | 0.014 *  | 0.030 *           | 0.955 *           | 0.018 *  | 0.027 *           | 0.952 *           | 0.019 *  | 0.029 *           | 0.960 *           | 0.018 *  | 0.022 *           |
| 500 Uniform     | 0.7          | 0.959 *           | 0.014 *    | 0.027 *           | 0.959 *           | 0.015 *  | 0.026 *           | 0.955 *           | 0.016 *  | 0.029 *           | 0.958 *           | 0.016 *  | 0.026 *           | 0.960 *           | 0.014 *  | 0.026 *           | 0.960 *           | 0.014 *  | 0.026 *           | 0.959 *           | 0.012    | 0.029 *           |
| 500 K1          | 0.7          | 0.911 *           | 0.004      | 0.085             | 0.866             | 0.007    | 0.127             | 0.949 *           | 0.017 *  | 0.034 *           | 0.948 *           | 0.016 *  | 0.036 *           | 0.947 *           | 0.016 *  | 0.037             | 0.947 *           | 0.017 *  | 0.036 *           | 0.944 *           | 0.013    | 0.043             |
| 500 K2          | 0.7          | 0.866             | 0.010      | 0.124             | 0.787             | 0.020 *  | 0.193             | 0.940 *           | 0.036 *  | 0.024 *           | 0.942 *           | 0.032 *  | 0.026 *           | 0.947 *           | 0.031 *  | 0.022 *           | 0.938 *           | 0.034 *  | 0.028 *           | 0.939 *           | 0.025 *  | 0.036 *           |
| 500 $\chi^2_1$  | 0.7          | 0.876             | 0.007      | 0.117             | 0.805             | 0.018 *  | 0.177             | 0.935 *           | 0.036 *  | 0.029 *           | 0.942 *           | 0.032 *  | 0.026 *           | 0.947 *           | 0.023 *  | 0.030 *           | 0.942 *           | 0.026 *  | 0.032 *           | 0.891             | 0.004    | 0.105             |
| 1000 Normal     | 0.7          | 0.924 *           | 0.029 *    | 0.047             | 0.928 *           | 0.023 *  | 0.049             | 0.927 *           | 0.028 *  | 0.045             | 0.931 *           | 0.023 *  | 0.046             | 0.930 *           | 0.026 *  | 0.044             | 0.931 *           | 0.025 *  | 0.044             | 0.930 *           | 0.027 *  | 0.043             |
| 1000 Uniform    | 0.7          | 0.947 *           | 0.027 *    | 0.026 *           | 0.952 *           | 0.024 *  | 0.024 *           | 0.949 *           | 0.021 *  | 0.030 *           | 0.951 *           | 0.020 *  | 0.029 *           | 0.950 *           | 0.019 *  | 0.031 *           | 0.951 *           | 0.019 *  | 0.030 *           | 0.952 *           | 0.018 *  | 0.030 *           |
| 1000 K1         | 0.7          | 0.862             | 0.004      | 0.134             | 0.814             | 0.006    | 0.180             | 0.944 *           | 0.026 *  | 0.030 *           | 0.949 *           | 0.022 *  | 0.029 *           | 0.950 *           | 0.023 *  | 0.027 *           | 0.953 *           | 0.020 *  | 0.027 *           | 0.943 *           | 0.018 *  | 0.039             |
| 1000 K2         | 0.7          | 0.804             | 0.001      | 0.195             | 0.725             | 0.004    | 0.271             | 0.951 *           | 0.021 *  | 0.028 *           | 0.950 *           | 0.016 *  | 0.034 *           | 0.955 *           | 0.017 *  | 0.028 *           | 0.948 *           | 0.020 *  | 0.032 *           | 0.939 *           | 0.012    | 0.049             |
| 1000 $\chi^2_1$ | 0.7          | 0.756             | 0.004      | 0.240             | 0.674             | 0.006    | 0.320             | 0.936 *           | 0.031 *  | 0.033 *           | 0.936 *           | 0.028 *  | 0.036 *           | 0.939 *           | 0.029 *  | 0.032 *           | 0.941 *           | 0.027 *  | 0.032 *           | 0.818             | 0.001    | 0.181             |
| 5000 Normal     | 0.7          | 0.935 *           | 0.026 *    | 0.039             | 0.939 *           | 0.023 *  | 0.038             | 0.937 *           | 0.025 *  | 0.038             | 0.938 *           | 0.025 *  | 0.037             | 0.942 *           | 0.024 *  | 0.034 *           | 0.943 *           | 0.023 *  | 0.034 *           | 0.945 *           | 0.023 *  | 0.032 *           |
| 5000 Uniform    | 0.7          | 0.938 *           | 0.043      | 0.019 *           | 0.946 *           | 0.036 *  | 0.018 *           | 0.940 *           | 0.027 *  | 0.033 *           | 0.945 *           | 0.023 *  | 0.032 *           | 0.943 *           | 0.024 *  | 0.033 *           | 0.942 *           | 0.024 *  | 0.034 *           | 0.943 *           | 0.024 *  | 0.033 *           |
| 5000 K1         | 0.7          | 0.539             | 0.000      | 0.461             | 0.473             | 0.000    | 0.527             | 0.928 *           | 0.038    | 0.034 *           | 0.941 *           | 0.029 *  | 0.030 *           | 0.939 *           | 0.032 *  | 0.029 *           | 0.939 *           | 0.033 *  | 0.028 *           | 0.914 *           | 0.033 *  | 0.053             |
| 5000 K2         | 0.7          | 0.335             | 0.000      | 0.665             | 0.268             | 0.000    | 0.732             | 0.944 *           | 0.031 *  | 0.025 *           | 0.953 *           | 0.025 *  | 0.022 *           | 0.958 *           | 0.023 *  | 0.019 *           | 0.954 *           | 0.024 *  | 0.022 *           | 0.877             | 0.034 *  | 0.089             |
| 5000 $\chi^2_1$ | 0.7          | 0.157             | 0.000      | 0.843             | 0.103             | 0.000    | 0.897             | 0.943 *           | 0.021 *  | 0.036 *           | 0.946 *           | 0.018 *  | 0.036 *           | 0.943 *           | 0.018 *  | 0.039             | 0.947 *           | 0.016 *  | 0.037             | 0.357             | 0.000    | 0.643             |
| 100 Normal      | 0.9          | 0.945 *           | 0.009      | 0.046             | 0.915 *           | 0.020 *  | 0.065             | 0.957 *           | 0.008    | 0.035 *           | 0.938 *           | 0.011    | 0.051             | 0.965 *           | 0.007    | 0.028 *           | 0.939 *           | 0.012    | 0.049             | 0.950 *           | 0.008    | 0.042             |
| 100 Uniform     | 0.9          | 0.945 *           | 0.007      | 0.048             | 0.925 *           | 0.020 *  | 0.055             | 0.961 *           | 0.004    | 0.035 *           | 0.941 *           | 0.013    | 0.046             | 0.960 *           | 0.004    | 0.036 *           | 0.941 *           | 0.016 *  | 0.043             | 0.947 *           | 0.005    | 0.048             |
| 100 K1          | 0.9          | 0.910 *           | 0.008      | 0.082             | 0.836             | 0.023 *  | 0.141             | 0.932 *           | 0.011    | 0.057             | 0.909 *           | 0.018 *  | 0.073             | 0.940 *           | 0.007    | 0.053             | 0.909 *           | 0.019 *  | 0.072             | 0.940 *           | 0.007    | 0.053             |
| 100 K2          | 0.9          | 0.914 *           | 0.011      | 0.075             | 0.821             | 0.032 *  | 0.147             | 0.954 *           | 0.010    | 0.036 *           | 0.935 *           | 0.018 *  | 0.047             | 0.960 *           | 0.008    | 0.032 *           | 0.932 *           | 0.016 *  | 0.052             | 0.946 *           | 0.004    | 0.050             |
| 100 $\chi^2_1$  | 0.9          | 0.928 *           | 0.026 *    | 0.046             | 0.848             | 0.070    | 0.082             | 0.946 *           | 0.023 *  | 0.031 *           | 0.936 *           | 0.037    | 0.027 *           | 0.952 *           | 0.019 *  | 0.029 *           | 0.919 *           | 0.047    | 0.034 *           | 0.937 *           | 0.007    | 0.056             |
| 200 Normal      | 0.9          | 0.942 *           | 0.020 *    | 0.038             | 0.934 *           | 0.020 *  | 0.046             | 0.947 *           | 0.018 *  | 0.035 *           | 0.947 *           | 0.018 *  | 0.035 *           | 0.951 *           | 0.016 *  | 0.033 *           | 0.942 *           | 0.021 *  | 0.037             | 0.950 *           | 0.017 *  | 0.033 *           |
| 200 Uniform     | 0.9          | 0.941 *           | 0.022 *    | 0.037             | 0.936 *           | 0.026 *  | 0.038             | 0.944 *           | 0.021 *  | 0.035 *           | 0.940 *           | 0.022 *  | 0.038             | 0.949 *           | 0.020 *  | 0.031 *           | 0.937 *           | 0.023 *  | 0.040             | 0.944 *           | 0.021 *  | 0.035 *           |
| 200 K1          | 0.9          | 0.922 *           | 0.010      | 0.068             | 0.867             | 0.024 *  | 0.109             | 0.945 *           | 0.021 *  | 0.034 *           | 0.955 *           | 0.016 *  | 0.029 *           | 0.948 *           | 0.018 *  | 0.034 *           | 0.941 *           | 0.022 *  | 0.037             | 0.947 *           | 0.014 *  | 0.039             |
| 200 K2          | 0.9          | 0.900             | 0.010      | 0.090             | 0.825             | 0.026 *  | 0.149             | 0.950 *           | 0.014 *  | 0.036 *           | 0.942 *           | 0.017 *  | 0.041             | 0.949 *           | 0.011    | 0.040             | 0.930 *           | 0.019 *  | 0.051             | 0.939 *           | 0.015 *  | 0.046             |
| 200 $\chi^2_1$  | 0.9          | 0.911 *           | 0.012      | 0.077             | 0.840             | 0.032 *  | 0.128             | 0.942 *           | 0.019 *  | 0.039             | 0.936 *           | 0.021 *  | 0.043             | 0.941 *           | 0.017 *  | 0.042             | 0.929 *           | 0.025 *  | 0.046             | 0.913 *           | 0.007    | 0.080             |
| 500 Normal      | 0.9          | 0.936 *           | 0.027 *    | 0.037             | 0.937 *           | 0.024 *  | 0.039             | 0.937 *           | 0.025 *  | 0.038             | 0.934 *           | 0.026 *  | 0.040             | 0.940 *           | 0.022 *  | 0.038             | 0.933 *           | 0.026 *  | 0.041             | 0.940 *           | 0.021 *  | 0.039             |
| 500 Uniform     | 0.9          | 0.943 *           | 0.026 *    | 0.031 *           | 0.944 *           | 0.023 *  | 0.033 *           | 0.943 *           | 0.021 *  | 0.036 *           | 0.941 *           | 0.023 *  | 0.036 *           | 0.942 *           | 0.021 *  | 0.037             | 0.937 *           | 0.024 *  | 0.039             | 0.939 *           | 0.023 *  | 0.038             |
| 500 K1          | 0.9          | 0.893             | 0.012      | 0.095             | 0.843             | 0.017 *  | 0.140             | 0.938 *           | 0.021 *  | 0.041             | 0.945 *           | 0.018 *  | 0.037             | 0.947 *           | 0.021 *  | 0.032 *           | 0.947 *           | 0.021 *  | 0.032 *           | 0.954 *           | 0.017 *  | 0.029 *           |
| 500 K2          | 0.9          | 0.873             | 0.007      | 0.120             | 0.813             | 0.016 *  | 0.171             | 0.940 *           | 0.027 *  | 0.033 *           | 0.937 *           | 0.026 *  | 0.037             | 0.953 *           | 0.017 *  | 0.030 *           | 0.944 *           | 0.027 *  | 0.029 *           | 0.952 *           | 0.011    | 0.037             |
| 500 $\chi^2_1$  | 0.9          | 0.876             | 0.005      | 0.119             | 0.802             | 0.008    | 0.190             | 0.949 *           | 0.016 *  | 0.035 *           | 0.950 *           | 0.016 *  | 0.034 *           | 0.947 *           | 0.014 *  | 0.039             | 0.951 *           | 0.012    | 0.037             | 0.893             | 0.002    | 0.105             |
| 1000 Normal     | 0.9          | 0.944 *           | 0.025 *    | 0.031 *           | 0.945 *           | 0.023 *  | 0.032 *           | 0.951 *           | 0.022 *  | 0.027 *           | 0.951 *           | 0.023 *  | 0.026 *           | 0.951 *           | 0.024 *  | 0.025 *           | 0.950 *           | 0.025 *  | 0.025 *           | 0.954 *           | 0.019 *  | 0.027 *           |
| 1000 Uniform    | 0.9          | 0.944 *           | 0.026 *    | 0.030 *           | 0.950 *           | 0.025 *  | 0.025 *           | 0.947 *           | 0.019 *  | 0.034 *           | 0.949 *           | 0.018 *  | 0.033 *           | 0.947 *           | 0.020 *  | 0.033 *           | 0.946 *           | 0.020 *  | 0.034 *           | 0.950 *           | 0.019 *  | 0.031 *           |
| 1000 K1         | 0.9          | 0.863             | 0.003      | 0.134             | 0.802             | 0.007    | 0.191             | 0.940 *           | 0.020 *  | 0.040             | 0.948 *           | 0.017 *  | 0.035 *           | 0.941 *           | 0.022 *  | 0.037             | 0.941 *           | 0.020 *  | 0.039             | 0.937 *           | 0.016 *  | 0.047             |
| 1000 K2         | 0.9          | 0.789             | 0.001      | 0.210             | 0.724             | 0.002    | 0.274             | 0.947 *           | 0.021 *  | 0.032 *           | 0.953 *           | 0.016 *  | 0.031 *           | 0.955 *           | 0.015 *  | 0.030 *           | 0.957 *           | 0.012    | 0.031 *           | 0.931 *           | 0.012    | 0.057             |
| 1000 $\chi^2_1$ | 0.9          | 0.777             | 0.003      | 0.220             | 0.701             | 0.004    | 0.295             | 0.942 *           | 0.025 *  | 0.033 *           | 0.949 *           | 0.022 *  | 0.029 *           | 0.943 *           | 0.022 *  | 0.035 *           | 0.944 *           | 0.023 *  | 0.033 *           | 0.838             | 0.002    | 0.160             |
| 5000 Normal     | 0.9          | 0.950 *           | 0.025 *    | 0.025 *           | 0.954 *           | 0.024 *  | 0.022 *           | 0.950 *           | 0.026 *  | 0.024 *           | 0.951 *           | 0.026 *  | 0.023 *           | 0.949 *           | 0.025 *  | 0.026 *           | 0.950 *           | 0.026 *  | 0.024 *           | 0.952 *           | 0.023 *  | 0.025 *           |
| 5000 Uniform    | 0.9          | 0.939 *           | 0.036 *    | 0.025 *           | 0.947 *           | 0.033 *  | 0.020 *           | 0.940 *           | 0.023 *  | 0.037             | 0.943 *           | 0.021 *  | 0.036 *           | 0.939 *           | 0.024 *  | 0.037             | 0.942 *           | 0.022 *  | 0.036 *           | 0.942 *           | 0.023 *  | 0.035 *           |
| 5000 K1         | 0.9          | 0.536             | 0.000      | 0.464             | 0.462             | 0.001    | 0.537             | 0.932 *           | 0.037    | 0.031 *           | 0.945 *           | 0.027 *  | 0.028 *           | 0.949 *           | 0.025 *  | 0.026 *           | 0.951 *           | 0.024 *  | 0.025 *           | 0.923 *           | 0.023 *  | 0.054             |
| 5000 K2         | 0.9          | 0.346             | 0.000      | 0.654             | 0.268             | 0.000    | 0.732             | 0.936 *           | 0.026 *  | 0.038             | 0.943 *           | 0.023 *  | 0.034 *           | 0.948 *           | 0.020 *  | 0.032 *           | 0.949 *           | 0.020 *  | 0.031 *           | 0.890             | 0.036 *  | 0.074             |
| 5000 $\chi^2_1$ | 0.9          | 0.176             | 0.000      | 0.824             | 0.125             | 0.000    | 0.875             | 0.928 *           | 0.033 *  | 0.039             | 0.939 *           | 0.026 *  | 0.035 *           | 0.942 *           | 0.022 *  | 0.036 *           | 0.945 *           | 0.021 *  | 0.034 *           | 0.401             | 0.000    | 0.599             |

Note. ML means maximum likelihood. SB means Satorra-Bentler correction. cov means coverage rate. For coverage rate, \* means (Coverage Rate &gt; 0.9) criterion met.

Supplementary Table 4 (Continued)

Coverage and Non-Coverage Rates of the Lower Order Effects

| Sample          | Statistical | $\gamma_2$ |                  |                  |          |                  |                  |          |                  |                  |          |                  |                  |          |                  |                  |          |                  |                  |          |                  |                  |
|-----------------|-------------|------------|------------------|------------------|----------|------------------|------------------|----------|------------------|------------------|----------|------------------|------------------|----------|------------------|------------------|----------|------------------|------------------|----------|------------------|------------------|
|                 |             | CPI        |                  |                  |          |                  | GAPI             |          |                  |                  |          | UPI              |                  |          |                  |                  | LMS      |                  |                  |          |                  |                  |
|                 |             | cov (ML)   | $>\gamma_2$ (ML) | $<\gamma_2$ (ML) | cov (SB) | $>\gamma_2$ (SB) | $<\gamma_2$ (SB) | cov (ML) | $>\gamma_2$ (ML) | $<\gamma_2$ (ML) | cov (SB) | $>\gamma_2$ (SB) | $<\gamma_2$ (SB) | cov (ML) | $>\gamma_2$ (ML) | $<\gamma_2$ (ML) | cov (SB) | $>\gamma_2$ (SB) | $<\gamma_2$ (SB) | cov (ML) | $>\gamma_2$ (ML) | $<\gamma_2$ (ML) |
| 100 Normal      | 0.7         | 0.939 *    | 0.016 *          | 0.045            | 0.910 *  | 0.028 *          | 0.062            | 0.948 *  | 0.011            | 0.041            | 0.924 *  | 0.024 *          | 0.052            | 0.950 *  | 0.011            | 0.039            | 0.925 *  | 0.020 *          | 0.055            | 0.939 *  | 0.015 *          | 0.046            |
| 100 Uniform     | 0.7         | 0.958 *    | 0.009            | 0.033 *          | 0.944 *  | 0.010            | 0.046            | 0.964 *  | 0.006            | 0.030 *          | 0.944 *  | 0.010            | 0.046            | 0.967 *  | 0.008            | 0.025 *          | 0.939 *  | 0.015 *          | 0.046            | 0.957 *  | 0.007            | 0.036 *          |
| 100 K1          | 0.7         | 0.934 *    | 0.009            | 0.057            | 0.853    | 0.033 *          | 0.114            | 0.961 *  | 0.012            | 0.027 *          | 0.935 *  | 0.020 *          | 0.045            | 0.964 *  | 0.008            | 0.028 *          | 0.931 *  | 0.017 *          | 0.052            | 0.941 *  | 0.013            | 0.046            |
| 100 K2          | 0.7         | 0.916 *    | 0.011            | 0.073            | 0.819    | 0.035 *          | 0.146            | 0.960 *  | 0.010            | 0.030 *          | 0.939 *  | 0.014 *          | 0.047            | 0.955 *  | 0.008            | 0.037            | 0.918 *  | 0.023 *          | 0.059            | 0.944 *  | 0.008            | 0.048            |
| 100 $\chi^2_1$  | 0.7         | 0.925 *    | 0.020 *          | 0.055            | 0.853    | 0.047            | 0.100            | 0.949 *  | 0.016 *          | 0.035 *          | 0.941 *  | 0.021 *          | 0.038            | 0.951 *  | 0.014 *          | 0.035 *          | 0.919 *  | 0.034 *          | 0.047            | 0.938 *  | 0.003            | 0.059            |
| 200 Normal      | 0.7         | 0.951 *    | 0.014 *          | 0.035 *          | 0.936 *  | 0.022 *          | 0.042            | 0.951 *  | 0.017 *          | 0.032 *          | 0.945 *  | 0.019 *          | 0.036 *          | 0.958 *  | 0.014 *          | 0.028 *          | 0.943 *  | 0.019 *          | 0.038            | 0.955 *  | 0.011            | 0.034 *          |
| 200 Uniform     | 0.7         | 0.946 *    | 0.019 *          | 0.035 *          | 0.947 *  | 0.017 *          | 0.036 *          | 0.950 *  | 0.017 *          | 0.033 *          | 0.946 *  | 0.017 *          | 0.037            | 0.953 *  | 0.016 *          | 0.031 *          | 0.946 *  | 0.018 *          | 0.036 *          | 0.951 *  | 0.015 *          | 0.034 *          |
| 200 K1          | 0.7         | 0.911 *    | 0.016 *          | 0.073            | 0.854    | 0.029 *          | 0.117            | 0.937 *  | 0.023 *          | 0.040            | 0.932 *  | 0.026 *          | 0.042            | 0.943 *  | 0.021 *          | 0.036 *          | 0.925 *  | 0.028 *          | 0.047            | 0.939 *  | 0.016 *          | 0.045            |
| 200 K2          | 0.7         | 0.887      | 0.009            | 0.104            | 0.802    | 0.029 *          | 0.169            | 0.944 *  | 0.020 *          | 0.036 *          | 0.929 *  | 0.026 *          | 0.045            | 0.945 *  | 0.015 *          | 0.040            | 0.921 *  | 0.022 *          | 0.057            | 0.934 *  | 0.013            | 0.053            |
| 200 $\chi^2_1$  | 0.7         | 0.911 *    | 0.009            | 0.080            | 0.852    | 0.028 *          | 0.120            | 0.931 *  | 0.022 *          | 0.047            | 0.926 *  | 0.023 *          | 0.051            | 0.941 *  | 0.013            | 0.046            | 0.922 *  | 0.026 *          | 0.052            | 0.914 *  | 0.007            | 0.079            |
| 500 Normal      | 0.7         | 0.947 *    | 0.019 *          | 0.034 *          | 0.947 *  | 0.019 *          | 0.034 *          | 0.947 *  | 0.020 *          | 0.033 *          | 0.946 *  | 0.019 *          | 0.035 *          | 0.947 *  | 0.019 *          | 0.034 *          | 0.942 *  | 0.022 *          | 0.036 *          | 0.949 *  | 0.021 *          | 0.030 *          |
| 500 Uniform     | 0.7         | 0.951 *    | 0.023 *          | 0.026 *          | 0.954 *  | 0.021 *          | 0.025 *          | 0.948 *  | 0.021 *          | 0.031 *          | 0.949 *  | 0.021 *          | 0.030 *          | 0.953 *  | 0.019 *          | 0.028 *          | 0.946 *  | 0.023 *          | 0.031 *          | 0.950 *  | 0.017 *          | 0.033 *          |
| 500 K1          | 0.7         | 0.896      | 0.010            | 0.094            | 0.843    | 0.022 *          | 0.135            | 0.941 *  | 0.027 *          | 0.032 *          | 0.936 *  | 0.030 *          | 0.034 *          | 0.944 *  | 0.023 *          | 0.033 *          | 0.937 *  | 0.030 *          | 0.033 *          | 0.942 *  | 0.022 *          | 0.036 *          |
| 500 K2          | 0.7         | 0.860      | 0.003            | 0.137            | 0.801    | 0.008            | 0.191            | 0.944 *  | 0.019 *          | 0.037            | 0.949 *  | 0.014 *          | 0.037            | 0.952 *  | 0.012            | 0.036 *          | 0.937 *  | 0.017 *          | 0.046            | 0.943 *  | 0.012            | 0.045            |
| 500 $\chi^2_1$  | 0.7         | 0.857      | 0.004            | 0.139            | 0.782    | 0.011            | 0.207            | 0.936 *  | 0.025 *          | 0.039            | 0.935 *  | 0.028 *          | 0.037            | 0.939 *  | 0.021 *          | 0.040            | 0.935 *  | 0.022 *          | 0.043            | 0.880    | 0.005            | 0.115            |
| 1000 Normal     | 0.7         | 0.940 *    | 0.020 *          | 0.040            | 0.936 *  | 0.023 *          | 0.041            | 0.934 *  | 0.023 *          | 0.043            | 0.933 *  | 0.024 *          | 0.043            | 0.934 *  | 0.023 *          | 0.043            | 0.933 *  | 0.025 *          | 0.042            | 0.933 *  | 0.022 *          | 0.045            |
| 1000 Uniform    | 0.7         | 0.957 *    | 0.027 *          | 0.016 *          | 0.964 *  | 0.021 *          | 0.015 *          | 0.960 *  | 0.020 *          | 0.020 *          | 0.961 *  | 0.019 *          | 0.020 *          | 0.959 *  | 0.021 *          | 0.020 *          | 0.961 *  | 0.021 *          | 0.018 *          | 0.965 *  | 0.019 *          | 0.016 *          |
| 1000 K1         | 0.7         | 0.862      | 0.007            | 0.131            | 0.810    | 0.011            | 0.179            | 0.940 *  | 0.028 *          | 0.032 *          | 0.947 *  | 0.021 *          | 0.032 *          | 0.947 *  | 0.021 *          | 0.032 *          | 0.943 *  | 0.024 *          | 0.033 *          | 0.937 *  | 0.021 *          | 0.042            |
| 1000 K2         | 0.7         | 0.809      | 0.004            | 0.187            | 0.717    | 0.007            | 0.276            | 0.946 *  | 0.027 *          | 0.027 *          | 0.956 *  | 0.019 *          | 0.025 *          | 0.953 *  | 0.019 *          | 0.028 *          | 0.950 *  | 0.023 *          | 0.027 *          | 0.942 *  | 0.021 *          | 0.037            |
| 1000 $\chi^2_1$ | 0.7         | 0.731      | 0.000            | 0.269            | 0.649    | 0.004            | 0.347            | 0.931 *  | 0.026 *          | 0.043            | 0.940 *  | 0.022 *          | 0.038            | 0.935 *  | 0.024 *          | 0.041            | 0.936 *  | 0.023 *          | 0.041            | 0.810    | 0.001            | 0.189            |
| 5000 Normal     | 0.7         | 0.941 *    | 0.032 *          | 0.027 *          | 0.947 *  | 0.028 *          | 0.025 *          | 0.944 *  | 0.030 *          | 0.026 *          | 0.945 *  | 0.028 *          | 0.027 *          | 0.946 *  | 0.028 *          | 0.026 *          | 0.946 *  | 0.028 *          | 0.026 *          | 0.950 *  | 0.029 *          | 0.021 *          |
| 5000 Uniform    | 0.7         | 0.941 *    | 0.038            | 0.021 *          | 0.948 *  | 0.035 *          | 0.017 *          | 0.944 *  | 0.025 *          | 0.031 *          | 0.945 *  | 0.024 *          | 0.031 *          | 0.947 *  | 0.024 *          | 0.029 *          | 0.947 *  | 0.024 *          | 0.029 *          | 0.949 *  | 0.023 *          | 0.028 *          |
| 5000 K1         | 0.7         | 0.511      | 0.000            | 0.489            | 0.444    | 0.000            | 0.556            | 0.941 *  | 0.020 *          | 0.039            | 0.952 *  | 0.017 *          | 0.031 *          | 0.960 *  | 0.013            | 0.027 *          | 0.958 *  | 0.013            | 0.029 *          | 0.930 *  | 0.017 *          | 0.053            |
| 5000 K2         | 0.7         | 0.336      | 0.000            | 0.664            | 0.272    | 0.000            | 0.728            | 0.933 *  | 0.031 *          | 0.036 *          | 0.941 *  | 0.029 *          | 0.030 *          | 0.951 *  | 0.018 *          | 0.031 *          | 0.949 *  | 0.020 *          | 0.031 *          | 0.878    | 0.034 *          | 0.088            |
| 5000 $\chi^2_1$ | 0.7         | 0.169      | 0.000            | 0.831            | 0.112    | 0.000            | 0.888            | 0.938 *  | 0.022 *          | 0.040            | 0.955 *  | 0.016 *          | 0.029 *          | 0.953 *  | 0.016 *          | 0.031 *          | 0.957 *  | 0.016 *          | 0.027 *          | 0.384    | 0.000            | 0.616            |
| 100 Normal      | 0.9         | 0.934 *    | 0.016 *          | 0.050            | 0.897    | 0.030 *          | 0.073            | 0.950 *  | 0.014 *          | 0.036 *          | 0.921 *  | 0.022 *          | 0.057            | 0.949 *  | 0.015 *          | 0.036 *          | 0.919 *  | 0.024 *          | 0.057            | 0.944 *  | 0.016 *          | 0.040            |
| 100 Uniform     | 0.9         | 0.945 *    | 0.009            | 0.046            | 0.935 *  | 0.008            | 0.057            | 0.951 *  | 0.007            | 0.042            | 0.934 *  | 0.008            | 0.058            | 0.957 *  | 0.005            | 0.038            | 0.928 *  | 0.014 *          | 0.058            | 0.947 *  | 0.009            | 0.044            |
| 100 K1          | 0.9         | 0.906 *    | 0.013            | 0.081            | 0.841    | 0.037            | 0.122            | 0.938 *  | 0.013            | 0.049            | 0.922 *  | 0.022 *          | 0.056            | 0.942 *  | 0.011            | 0.047            | 0.915 *  | 0.027 *          | 0.058            | 0.931 *  | 0.010            | 0.059            |
| 100 K2          | 0.9         | 0.900      | 0.017 *          | 0.083            | 0.809    | 0.043            | 0.148            | 0.946 *  | 0.014 *          | 0.040            | 0.931 *  | 0.018 *          | 0.051            | 0.956 *  | 0.013            | 0.031 *          | 0.922 *  | 0.023 *          | 0.055            | 0.943 *  | 0.008            | 0.049            |
| 100 $\chi^2_1$  | 0.9         | 0.927 *    | 0.024 *          | 0.049            | 0.861    | 0.041            | 0.098            | 0.950 *  | 0.024 *          | 0.026 *          | 0.943 *  | 0.023 *          | 0.034 *          | 0.952 *  | 0.018 *          | 0.030 *          | 0.922 *  | 0.034 *          | 0.044            | 0.937 *  | 0.006            | 0.057            |
| 200 Normal      | 0.9         | 0.955 *    | 0.008            | 0.037            | 0.944 *  | 0.011            | 0.045            | 0.959 *  | 0.010            | 0.031 *          | 0.954 *  | 0.013            | 0.033 *          | 0.961 *  | 0.009            | 0.030 *          | 0.955 *  | 0.013            | 0.032 *          | 0.959 *  | 0.008            | 0.033 *          |
| 200 Uniform     | 0.9         | 0.949 *    | 0.011            | 0.040            | 0.940 *  | 0.011            | 0.049            | 0.949 *  | 0.011            | 0.040            | 0.944 *  | 0.011            | 0.045            | 0.947 *  | 0.011            | 0.042            | 0.942 *  | 0.012            | 0.046            | 0.945 *  | 0.010            | 0.045            |
| 200 K1          | 0.9         | 0.924 *    | 0.008            | 0.068            | 0.876    | 0.018 *          | 0.106            | 0.960 *  | 0.013            | 0.027 *          | 0.954 *  | 0.016 *          | 0.030 *          | 0.957 *  | 0.013            | 0.030 *          | 0.950 *  | 0.017 *          | 0.033 *          | 0.960 *  | 0.006            | 0.034 *          |
| 200 K2          | 0.9         | 0.896      | 0.010            | 0.094            | 0.797    | 0.031 *          | 0.172            | 0.949 *  | 0.015 *          | 0.036 *          | 0.943 *  | 0.019 *          | 0.038            | 0.947 *  | 0.017 *          | 0.036 *          | 0.930 *  | 0.027 *          | 0.043            | 0.929 *  | 0.010            | 0.061            |
| 200 $\chi^2_1$  | 0.9         | 0.909 *    | 0.020 *          | 0.071            | 0.851    | 0.038            | 0.111            | 0.936 *  | 0.025 *          | 0.039            | 0.935 *  | 0.026 *          | 0.039            | 0.938 *  | 0.023 *          | 0.039            | 0.926 *  | 0.033 *          | 0.041            | 0.918 *  | 0.007            | 0.075            |
| 500 Normal      | 0.9         | 0.934 *    | 0.019 *          | 0.047            | 0.930 *  | 0.022 *          | 0.048            | 0.935 *  | 0.020 *          | 0.045            | 0.935 *  | 0.022 *          | 0.043            | 0.937 *  | 0.020 *          | 0.043            | 0.934 *  | 0.022 *          | 0.044            | 0.936 *  | 0.019 *          | 0.045            |
| 500 Uniform     | 0.9         | 0.951 *    | 0.024 *          | 0.025 *          | 0.955 *  | 0.023 *          | 0.022 *          | 0.947 *  | 0.022 *          | 0.031 *          | 0.946 *  | 0.023 *          | 0.031 *          | 0.947 *  | 0.022 *          | 0.031 *          | 0.946 *  | 0.023 *          | 0.031 *          | 0.952 *  | 0.022 *          | 0.026 *          |
| 500 K1          | 0.9         | 0.885      | 0.014 *          | 0.101            | 0.833    | 0.025 *          | 0.142            | 0.933 *  | 0.028 *          | 0.039            | 0.932 *  | 0.031 *          | 0.037            | 0.937 *  | 0.022 *          | 0.041            | 0.931 *  | 0.027 *          | 0.042            | 0.944 *  | 0.020 *          | 0.036 *          |
| 500 K2          | 0.9         | 0.875      | 0.008            | 0.117            | 0.796    | 0.017 *          | 0.187            | 0.939 *  | 0.027 *          | 0.034 *          | 0.937 *  | 0.029 *          | 0.034 *          | 0.949 *  | 0.025 *          | 0.026 *          | 0.943 *  | 0.030 *          | 0.027 *          | 0.939 *  | 0.018 *          | 0.043            |
| 500 $\chi^2_1$  | 0.9         | 0.871      | 0.005            | 0.124            | 0.813    | 0.011            | 0.176            | 0.946 *  | 0.012            | 0.042            | 0.942 *  | 0.017 *          | 0.041            | 0.946 *  | 0.013            | 0.041            | 0.945 *  | 0.017 *          | 0.038            | 0.881    | 0.003            | 0.116            |
| 1000 Normal     | 0.9         | 0.930 *    | 0.027 *          | 0.043            | 0.931 *  | 0.026 *          | 0.043            | 0.935 *  | 0.025 *          | 0.040            | 0.935 *  | 0.025 *          | 0.040            | 0.937 *  | 0.026 *          | 0.037            | 0.934 *  | 0.028 *          | 0.038            | 0.936 *  | 0.025 *          | 0.039            |
| 1000 Uniform    | 0.9         | 0.943 *    | 0.029 *          | 0.028 *          | 0.953 *  | 0.022 *          | 0.025 *          | 0.945 *  | 0.020 *          | 0.035 *          | 0.943 *  | 0.020 *          | 0.037            | 0.948 *  | 0.018 *          | 0.034 *          | 0.940 *  | 0.019 *          | 0.041            | 0.948 *  | 0.019 *          | 0.033 *          |
| 1000 K1         | 0.9         | 0.854      | 0.003            | 0.143            | 0.803    | 0.009            | 0.188            | 0.935 *  | 0.025 *          | 0.040            | 0.942 *  | 0.023 *          | 0.035 *          | 0.953 *  | 0.016 *          | 0.031 *          | 0.952 *  | 0.016 *          | 0.032 *          | 0.943 *  | 0.015 *          | 0.042            |
| 1000 K2         | 0.9         | 0.801      | 0.003            | 0.196            | 0.733    | 0.004            | 0.263            | 0.940 *  | 0.032 *          | 0.028 *          | 0.942 *  | 0.029 *          | 0.029 *          | 0.944 *  | 0.030 *          | 0.026 *          | 0.941 *  | 0.030 *          | 0.029 *          | 0.936 *  | 0.028 *          | 0.036 *          |
| 1000 $\chi^2_1$ | 0.9         | 0.766      | 0.002            | 0.232            | 0.678    | 0.006            | 0.316            | 0.931 *  | 0.029 *          | 0.040            | 0.943 *  | 0.024 *          | 0.033 *          | 0.942 *  | 0.024 *          | 0.034 *          | 0.941 *  | 0.027 *          | 0.032 *          | 0.814    | 0.002            | 0.184            |
| 5000 Normal     | 0.9         | 0.943 *    | 0.027 *          | 0.030 *          | 0.947 *  | 0.024 *          | 0.029 *          | 0.946 *  | 0.026 *          | 0.028 *          | 0.950 *  | 0.024 *          | 0.026 *          | 0.948 *  | 0.024 *          | 0.028 *          | 0.949 *  | 0.023 *          | 0.028 *          | 0.948 *  | 0.022 *          | 0.030 *          |
| 5000 Uniform    | 0.9         | 0.938 *    | 0.040            | 0.022 *          | 0.945 *  | 0.035 *          | 0.020 *          | 0.942 *  | 0.028 *          | 0.030 *          | 0.946 *  | 0.025 *          | 0.029 *          | 0.944 *  | 0.028 *          | 0.028 *          | 0.946 *  | 0.026 *          | 0.028 *          | 0.949 *  | 0.026 *          | 0.025 *          |
| 5000 K1         | 0.9         | 0.535      | 0.000            | 0.465            | 0.468    | 0.000            | 0.532            | 0.939 *  | 0.028 *          | 0.033 *          | 0.953 *  | 0.022 *          | 0.025 *          | 0.952 *  | 0.017 *          | 0.031 *          | 0.954 *  | 0.016 *          | 0.030 *          | 0.922 *  | 0.023 *          | 0.055            |
| 5000 K2         | 0.9         | 0.322      | 0.000            | 0.678            | 0.276    | 0.000            | 0.724            | 0.938 *  | 0.029 *          | 0.033 *          | 0.943 *  | 0.027 *          | 0.030 *          | 0.948 *  | 0.025 *          | 0.027 *          | 0.945 *  | 0.026 *          | 0.029 *          | 0.892    | 0.035 *          | 0.073            |
| 5000 $\chi^2_1$ | 0.9         | 0.165      | 0.000            | 0.835            | 0.104    | 0.000            | 0.896            | 0.928 *  | 0.028 *          | 0.044            | 0.940 *  | 0.022 *          | 0.038            | 0.939 *  | 0.021 *          | 0.040            | 0.939 *  | 0.022 *          | 0.039            | 0.382    | 0.000            | 0.618            |

Note. ML means maximum likelihood. SB means Satorra-Bentler correction. cov means coverage rate. For coverage rate, \* means (Coverage Rate > 0.9) criterion met.

(&
